# Supplementary material for: Road Traffic Accidents and Disparities in Child Mortality
Source: Oxford University Press journal article supplement (doi:10.1542/peds.2019-3009), 2020-10-20
Supplement: peds_20193009supplementarydata.xlsx [file peds_20193009supplementarydata.xlsx]

## Sheet: Suppl Table 1
	Supplementary Table 1. 2013 NCHS Urban–Rural Classification Scheme for Counties
			Definitions
	Metropolitan cateogories
		Large central metro	Counties in MSAs of 1 million or more population that: Contain the entire population of the largest principal city of the MSA, or Have their entire population contained in the largest principal city of the MSA, or Contain at least 250,000 inhabitants of any principal city of the MSA
		Large fringe metro	Counties in MSAs of 1 million or more population that did not qualify as large central metro counties
		Medium metro	Counties in MSAs of populations of 250,000 to 999,999
		Small metro	Counties in MSAs of populations less than 250,000
	Nonmetropolitan categories
		Micropolitan	Counties in micropolitan statistical areas
		Noncore	Nonmetropolitan counties that did not qualify as micropolitan
	MSA=metropolitan statistical area

## Sheet: Suppl Table 2
	Supplementary Table 2. Age- sex-standardized county-specific pediatric mortality, per 100,000 children
	County	Median (95% credibility interval)
	Alabama
	Autauga	3.34 (1.4-7.21)
	Baldwin	2.49 (1.28-4.49)
	Barbour	3.5 (1.3-8.42)
	Bibb	3.12 (1.09-8.04)
	Blount	2.65 (1.06-5.88)
	Bullock	7.46 (2.72-18.74)
	Butler	5.93 (2.3-13.72)
	Calhoun	1.41 (.57-3.11)
	Chambers	3.32 (1.25-7.93)
	Cherokee	3.78 (1.35-9.51)
	Chilton	4.91 (2.17-10.22)
	Choctaw	7.5 (2.77-18.35)
	Clarke	3.69 (1.37-9.27)
	Clay	4.43 (1.53-11.89)
	Cleburne	3.23 (1.09-8.67)
	Coffee	3.88 (1.66-8.15)
	Colbert	2.51 (.97-5.87)
	Conecuh	5.79 (2.09-14.73)
	Coosa	6.29 (2.22-16.49)
	Covington	8.72 (4.06-16.7)
	Crenshaw	3.32 (1.12-9.05)
	Cullman	4.59 (2.22-8.51)
	Dale	3.03 (1.27-6.53)
	Dallas	2.7 (1.09-6.12)
	DeKalb	4.02 (1.91-7.64)
	Elmore	2.83 (1.2-5.89)
	Escambia	11.78 (5.85-21.43)
	Etowah	2.18 (.92-4.57)
	Fayette	3.16 (1.09-8.61)
	Franklin	4.66 (1.89-10.09)
	Geneva	4.11 (1.53-9.91)
	Greene	8.27 (2.98-21.07)
	Hale	3.74 (1.31-9.71)
	Henry	3.73 (1.29-9.91)
	Houston	1.92 (.81-4.03)
	Jackson	3.39 (1.39-7.46)
	Jefferson	2.67 (1.85-3.71)
	Lamar	3.29 (1.08-9.18)
	Lauderdale	3.25 (1.46-6.5)
	Lawrence	2.89 (1.06-7.08)
	Lee	2.06 (.94-4.04)
	Limestone	3.11 (1.41-6.2)
	Lowndes	5.03 (1.76-13.5)
	Macon	6.31 (2.47-14.85)
	Madison	2.08 (1.17-3.42)
	Marengo	3.81 (1.39-9.43)
	Marion	4.45 (1.67-10.27)
	Marshall	2.95 (1.39-5.7)
	Mobile	2.47 (1.54-3.73)
	Monroe	8.6 (3.57-18.44)
	Montgomery	1.82 (.93-3.24)
	Morgan	2.94 (1.44-5.5)
	Perry	4.58 (1.52-12.52)
	Pickens	3.51 (1.25-9.12)
	Pike	5.08 (2.08-11.17)
	Randolph	3.73 (1.35-9.48)
	Russell	3.69 (1.62-7.52)
	St. Clair	3.89 (1.82-7.36)
	Shelby	2.14 (1.09-3.81)
	Sumter	4.44 (1.54-11.76)
	Talladega	2.59 (1.1-5.48)
	Tallapoosa	3.74 (1.49-8.44)
	Tuscaloosa	4.29 (2.48-6.83)
	Walker	3.1 (1.29-6.68)
	Washington	8.12 (3.18-18.66)
	Wilcox	3.42 (1.13-9.53)
	Winston	2.92 (1.02-7.75)
	Alaska
	Aleutians East Borough	4.12 (1.29-12.87)
	Aleutians West Census Area	4.01 (1.23-12.33)
	Anchorage Municipality	1.28 (.65-2.31)
	Bethel Census Area	4.26 (1.64-9.99)
	Bristol Bay Borough	4.29 (1.34-13.25)
	Denali Borough	4.16 (1.32-13.13)
	Dillingham Census Area	3.66 (1.19-10.74)
	Fairbanks North Star Borough	2.47 (1.18-4.8)
	Haines Borough	4.14 (1.28-13.17)
	Hoonah-Angoon Census Area	4.07 (1.27-12.63)
	Juneau City and Borough	2.02 (.71-5.28)
	Kenai Peninsula Borough	4.37 (1.89-8.77)
	Ketchikan Gateway Borough	2.42 (.79-6.78)
	Kodiak Island Borough	3.07 (1.05-8.21)
	Kusilvak Census Area	4.31 (1.5-11.16)
	Lake and Peninsula Borough	4.12 (1.33-12.82)
	Matanuska-Susitna Borough	2.67 (1.24-5.26)
	Nome Census Area	4.12 (1.46-10.65)
	North Slope Borough	3.36 (1.12-9.16)
	Northwest Arctic Borough	3.28 (1.1-8.82)
	Petersburg Borough	3.97 (1.28-11.87)
	Prince of Wales-Hyder Census Area	3.73 (1.18-10.99)
	Sitka City and Borough	3.52 (1.15-10)
	Skagway Municipality	4.25 (1.3-13.79)
	Southeast Fairbanks Census Area	3.62 (1.19-10.43)
	Valdez-Cordova Census Area	3.47 (1.17-9.81)
	Wrangell City and Borough	4.11 (1.26-13.04)
	Yakutat City and Borough	4.24 (1.33-13.46)
	Yukon-Koyukuk Census Area	5 (1.64-14.4)
	Arizona
	Apache	6.01 (3.26-10.2)
	Cochise	2.09 (.95-4.17)
	Coconino	8.94 (5.72-13.23)
	Gila	5.48 (2.49-10.92)
	Graham	2.68 (1.06-6.06)
	Greenlee	6.15 (2.13-16.07)
	La Paz	18.69 (8.56-36.47)
	Maricopa	1.53 (1.26-1.84)
	Mohave	4.8 (2.82-7.57)
	Navajo	9.53 (6.21-13.89)
	Pima	1.64 (1.12-2.31)
	Pinal	2.81 (1.83-4.08)
	Santa Cruz	2.54 (1.01-5.63)
	Yavapai	3.49 (1.88-5.9)
	Yuma	2.2 (1.16-3.82)
	Arkansas
	Arkansas	3.05 (1.04-8.1)
	Ashley	3.74 (1.34-9.18)
	Baxter	2.02 (.7-5.21)
	Benton	.97 (.44-1.93)
	Boone	3.14 (1.18-7.52)
	Bradley	3.35 (1.15-9.38)
	Calhoun	5.35 (1.76-15.78)
	Carroll	7.99 (3.33-16.89)
	Chicot	9.03 (3.52-21.27)
	Clark	3.82 (1.39-9.73)
	Clay	3.22 (1.09-8.64)
	Cleburne	4.77 (1.78-11.45)
	Cleveland	3.07 (1.01-8.63)
	Columbia	2.15 (.74-5.89)
	Conway	4.77 (1.76-11.49)
	Craighead	4.65 (2.47-8.08)
	Crawford	2.1 (.84-4.71)
	Crittenden	3.01 (1.25-6.33)
	Cross	4.02 (1.44-10.19)
	Dallas	3.68 (1.18-10.46)
	Desha	3.15 (1.09-8.35)
	Drew	3.07 (1.08-8.05)
	Faulkner	3.81 (1.97-6.75)
	Franklin	3.05 (1.05-7.95)
	Fulton	3.43 (1.14-9.52)
	Garland	1.81 (.71-3.98)
	Grant	2.62 (.91-7.02)
	Greene	2.29 (.86-5.47)
	Hempstead	2.69 (.98-6.79)
	Hot Spring	4.88 (2-10.72)
	Howard	3.17 (1.09-8.42)
	Independence	2.42 (.89-5.93)
	Izard	3.5 (1.19-9.57)
	Jackson	3.18 (1.1-8.63)
	Jefferson	2.86 (1.24-5.92)
	Johnson	3.44 (1.26-8.41)
	Lafayette	3.68 (1.19-10.63)
	Lawrence	3.16 (1.1-8.36)
	Lee	3.51 (1.16-9.91)
	Lincoln	2.2 (.71-6.49)
	Little River	2.95 (.98-8.24)
	Logan	4.77 (1.82-11.51)
	Lonoke	2.84 (1.25-5.84)
	Madison	4.63 (1.66-11.66)
	Marion	9.41 (3.57-21.88)
	Miller	4.39 (1.88-9.12)
	Mississippi	2.57 (1.01-5.79)
	Monroe	6.51 (2.19-17.67)
	Montgomery	4.88 (1.65-13.66)
	Nevada	3.57 (1.19-9.99)
	Newton	2.66 (.83-8.28)
	Ouachita	2.08 (.74-5.48)
	Perry	2.12 (.68-6.4)
	Phillips	4.4 (1.67-10.1)
	Pike	4.51 (1.53-12.01)
	Poinsett	3.22 (1.17-7.97)
	Polk	7.56 (3.05-16.86)
	Pope	2.41 (.95-5.24)
	Prairie	6.7 (2.27-18.07)
	Pulaski	1.68 (.95-2.75)
	Randolph	3.13 (1.08-8.3)
	St. Francis	3.35 (1.24-8.08)
	Saline	3 (1.4-5.73)
	Scott	4.53 (1.56-12.27)
	Searcy	5.07 (1.65-14.63)
	Sebastian	1.44 (.61-2.99)
	Sevier	3.67 (1.31-8.94)
	Sharp	3.22 (1.08-8.83)
	Stone	3.41 (1.17-9.55)
	Union	2.3 (.83-5.55)
	Van Buren	4.3 (1.48-11.39)
	Washington	1.32 (.62-2.53)
	White	3.01 (1.32-6.09)
	Woodruff	3.7 (1.18-10.73)
	Yell	6.65 (2.72-14.4)
	California
	Alameda	.81 (.51-1.19)
	Alpine	8.36 (2.62-26.26)
	Amador	2.88 (1.01-7.47)
	Butte	1.35 (.6-2.66)
	Calaveras	4.11 (1.6-9.51)
	Colusa	6.27 (2.64-13.43)
	Contra Costa	1.05 (.66-1.58)
	Del Norte	2.12 (.72-5.65)
	El Dorado	1.85 (.84-3.61)
	Fresno	2.03 (1.47-2.71)
	Glenn	4.78 (1.96-10.41)
	Humboldt	3.71 (1.88-6.7)
	Imperial	2.62 (1.42-4.48)
	Inyo	4.12 (1.47-10.47)
	Kern	2.29 (1.68-3.04)
	Kings	2.44 (1.29-4.31)
	Lake	3.66 (1.58-7.75)
	Lassen	3.57 (1.31-8.83)
	Los Angeles	.79 (.66-.93)
	Madera	3.74 (2.13-6.1)
	Marin	.79 (.32-1.73)
	Mariposa	4.46 (1.55-12.09)
	Mendocino	3.86 (1.84-7.39)
	Merced	3.1 (1.93-4.66)
	Modoc	4.8 (1.63-13.4)
	Mono	4.26 (1.49-10.89)
	Monterey	.96 (.51-1.69)
	Napa	1.32 (.54-2.9)
	Nevada	1.91 (.73-4.37)
	Orange	.91 (.67-1.2)
	Placer	.6 (.25-1.25)
	Plumas	4.3 (1.54-11.36)
	Riverside	1.42 (1.09-1.81)
	Sacramento	1.1 (.76-1.55)
	San Benito	1.33 (.48-3.31)
	San Bernardino	2.23 (1.8-2.73)
	San Diego	.86 (.64-1.13)
	San Francisco	.53 (.25-1.04)
	San Joaquin	1.9 (1.28-2.7)
	San Luis Obispo	1.54 (.73-2.93)
	San Mateo	.63 (.32-1.13)
	Santa Barbara	.68 (.31-1.33)
	Santa Clara	.65 (.42-.96)
	Santa Cruz	.93 (.4-1.92)
	Shasta	1.5 (.64-3.06)
	Sierra	4.05 (1.29-12.95)
	Siskiyou	3.73 (1.5-8.44)
	Solano	.8 (.38-1.54)
	Sonoma	1.09 (.56-1.93)
	Stanislaus	1.57 (.97-2.44)
	Sutter	1.16 (.46-2.72)
	Tehama	2.79 (1.17-5.94)
	Trinity	4.73 (1.6-12.8)
	Tulare	2.43 (1.64-3.49)
	Tuolumne	3.12 (1.19-7.34)
	Ventura	.77 (.43-1.27)
	Yolo	2.91 (1.54-4.99)
	Yuba	2.14 (.94-4.56)
	Colorado
	Adams	1.18 (.67-1.91)
	Alamosa	3.01 (1.04-7.87)
	Arapahoe	.41 (.18-.81)
	Archuleta	3.51 (1.16-9.88)
	Baca	4 (1.25-12.16)
	Bent	5.3 (1.76-15.56)
	Boulder	.97 (.43-1.94)
	Broomfield	1.35 (.49-3.26)
	Chaffee	5.81 (2.06-15.02)
	Cheyenne	15.15 (5.01-44.67)
	Clear Creek	1.45 (.45-4.58)
	Conejos	3.41 (1.14-9.65)
	Costilla	4.03 (1.27-12.58)
	Crowley	5.61 (1.78-17.3)
	Custer	4.06 (1.26-12.81)
	Delta	2.72 (.96-6.88)
	Denver	.91 (.51-1.55)
	Dolores	4.11 (1.29-12.74)
	Douglas	.57 (.25-1.22)
	Eagle	3.5 (1.52-7.25)
	Elbert	1.82 (.6-5.18)
	El Paso	1.47 (.92-2.25)
	Fremont	2.55 (.93-6.32)
	Garfield	3.22 (1.42-6.61)
	Gilpin	1.5 (.47-4.69)
	Grand	3.29 (1.12-8.87)
	Gunnison	7.44 (2.76-18.35)
	Hinsdale	4.19 (1.32-13.61)
	Huerfano	3.93 (1.23-11.82)
	Jackson	6.04 (1.9-19.05)
	Jefferson	.82 (.4-1.5)
	Kiowa	4.24 (1.27-13.51)
	Kit Carson	4.81 (1.59-13.26)
	Lake	4.7 (1.59-12.95)
	La Plata	3.43 (1.38-7.69)
	Larimer	.67 (.28-1.43)
	Las Animas	8.81 (3.38-20.32)
	Lincoln	5.3 (1.75-15.48)
	Logan	3.03 (1.04-7.94)
	Mesa	.92 (.35-2.05)
	Mineral	4.3 (1.27-14.12)
	Moffat	3.1 (1.06-8.38)
	Montezuma	2.83 (1-7.07)
	Montrose	2.35 (.87-5.74)
	Morgan	3.2 (1.21-7.57)
	Otero	3.98 (1.41-10.07)
	Ouray	4 (1.28-12.24)
	Park	1.39 (.44-4.23)
	Phillips	3.91 (1.26-11.77)
	Pitkin	2.49 (.84-7.24)
	Prowers	3.24 (1.12-8.78)
	Pueblo	2.46 (1.23-4.45)
	Rio Blanco	4.92 (1.67-13.71)
	Rio Grande	3.34 (1.14-9.13)
	Routt	2.25 (.76-6.04)
	Saguache	5.03 (1.66-14.08)
	San Juan	4.22 (1.32-13.66)
	San Miguel	4.97 (1.65-13.85)
	Sedgwick	4.13 (1.28-13)
	Summit	4.51 (1.74-10.64)
	Teller	1.97 (.64-5.54)
	Washington	7.33 (2.46-20.53)
	Weld	2.98 (1.8-4.62)
	Yuma	4.43 (1.55-11.72)
	Connecticut
	Fairfield	.59 (.31-1.01)
	Hartford	1.43 (.9-2.15)
	Litchfield	1.58 (.69-3.27)
	Middlesex	1.25 (.5-2.72)
	New Haven	1.32 (.82-2.04)
	New London	1.43 (.67-2.69)
	Tolland	.87 (.32-2.15)
	Windham	1.41 (.57-3.17)
	Delaware
	Kent	1.99 (.94-3.74)
	New Castle	.84 (.43-1.51)
	Sussex	2.64 (1.36-4.7)
	District of Columbia
	District of Columbia	.7 (.34-1.31)
	Florida
	Alachua	2.98 (1.65-5.01)
	Baker	4.35 (1.73-9.99)
	Bay	1.47 (.66-2.98)
	Bradford	4.4 (1.69-10.41)
	Brevard	2.09 (1.24-3.29)
	Broward	1.5 (1.09-2)
	Calhoun	3.25 (1.1-8.82)
	Charlotte	2.29 (.97-4.9)
	Citrus	1.93 (.79-4.16)
	Clay	1.61 (.73-3.14)
	Collier	2.74 (1.56-4.44)
	Columbia	5.77 (2.84-10.73)
	DeSoto	3.12 (1.21-7.41)
	Dixie	5.55 (2.02-13.92)
	Duval	1.72 (1.15-2.44)
	Escambia	1.73 (.91-3.02)
	Flagler	2.01 (.81-4.48)
	Franklin	6.27 (2.13-16.42)
	Gadsden	4.14 (1.78-8.67)
	Gilchrist	2 (.66-5.77)
	Glades	3.39 (1.14-9.39)
	Gulf	2.23 (.73-6.44)
	Hamilton	4.47 (1.52-11.88)
	Hardee	3.14 (1.17-7.41)
	Hendry	3.93 (1.64-8.33)
	Hernando	1.22 (.49-2.7)
	Highlands	1.67 (.65-3.88)
	Hillsborough	1.73 (1.23-2.34)
	Holmes	6.4 (2.45-15.09)
	Indian River	2.44 (1.08-4.92)
	Jackson	7.98 (3.82-15.39)
	Jefferson	3.77 (1.28-10.24)
	Lafayette	3.65 (1.18-10.46)
	Lake	2.79 (1.61-4.55)
	Lee	1.85 (1.12-2.88)
	Leon	2.86 (1.6-4.69)
	Levy	7.55 (3.48-14.81)
	Liberty	3.69 (1.21-10.99)
	Madison	3.92 (1.38-9.91)
	Manatee	1.64 (.85-2.92)
	Marion	2.99 (1.77-4.8)
	Martin	5.98 (3.26-10.24)
	Miami-Dade	1.22 (.91-1.6)
	Monroe	2.68 (1.04-6.11)
	Nassau	4.17 (1.89-8.31)
	Okaloosa	1.82 (.85-3.43)
	Okeechobee	3.57 (1.44-7.98)
	Orange	1.87 (1.34-2.53)
	Osceola	1.88 (1-3.24)
	Palm Beach	1.77 (1.24-2.45)
	Pasco	1.38 (.74-2.34)
	Pinellas	.73 (.38-1.29)
	Polk	3.27 (2.31-4.48)
	Putnam	5.96 (3.03-10.71)
	St. Johns	1.11 (.45-2.42)
	St. Lucie	2.33 (1.27-3.97)
	Santa Rosa	1.45 (.62-3)
	Sarasota	1.63 (.81-2.98)
	Seminole	1.4 (.74-2.44)
	Sumter	3.58 (1.39-8.32)
	Suwannee	3.65 (1.45-8.11)
	Taylor	3 (1.04-7.83)
	Union	4.39 (1.55-11.44)
	Volusia	3.39 (2.22-5)
	Wakulla	2.36 (.82-6.2)
	Walton	2.94 (1.2-6.63)
	Washington	4.7 (1.79-11.09)
	Georgia
	Appling	3.83 (1.34-9.62)
	Atkinson	4.54 (1.53-12.04)
	Bacon	4.34 (1.52-11.38)
	Baker	4.78 (1.55-14.33)
	Baldwin	3.51 (1.39-7.86)
	Banks	3.12 (1.07-8.27)
	Barrow	1.45 (.56-3.26)
	Bartow	2.57 (1.19-5.03)
	Ben Hill	2.88 (1.02-7.54)
	Berrien	3.82 (1.35-9.51)
	Bibb	1.41 (.64-2.77)
	Bleckley	4.52 (1.56-12.01)
	Brantley	4.37 (1.6-10.84)
	Brooks	2.72 (.93-7.42)
	Bryan	2.79 (1.03-6.78)
	Bulloch	7.09 (3.68-12.66)
	Burke	2.36 (.81-6.18)
	Butts	1.3 (.43-3.72)
	Calhoun	3.76 (1.2-11.07)
	Camden	2.44 (.98-5.33)
	Candler	3.35 (1.12-9.3)
	Carroll	1.79 (.77-3.71)
	Catoosa	2.19 (.85-4.9)
	Charlton	4.52 (1.55-12.08)
	Chatham	1.02 (.47-1.96)
	Chattahoochee	1.93 (.63-5.46)
	Chattooga	5.5 (2.19-12.63)
	Cherokee	.74 (.31-1.6)
	Clarke	1.3 (.51-2.96)
	Clay	5.54 (1.75-16.61)
	Clayton	1.07 (.52-1.98)
	Clinch	4.84 (1.63-13.66)
	Cobb	.7 (.37-1.22)
	Coffee	4.67 (2.05-9.53)
	Colquitt	2.03 (.78-4.71)
	Columbia	2.37 (1.11-4.62)
	Cook	3.79 (1.35-9.44)
	Coweta	1.62 (.7-3.29)
	Crawford	2.21 (.72-6.38)
	Crisp	5.42 (2.11-12.18)
	Dade	2.73 (.93-7.6)
	Dawson	2.4 (.83-6.6)
	Decatur	7.37 (3.15-15.47)
	DeKalb	1.25 (.78-1.92)
	Dodge	3.78 (1.35-9.52)
	Dooly	4.28 (1.48-11.35)
	Dougherty	3.01 (1.46-5.63)
	Douglas	2.36 (1.15-4.42)
	Early	5.98 (2.09-15.64)
	Echols	3.25 (1.04-9.66)
	Effingham	3.33 (1.38-7.13)
	Elbert	3.82 (1.37-9.49)
	Emanuel	3.55 (1.27-8.72)
	Evans	7.22 (2.65-17.92)
	Fannin	6.42 (2.45-15.26)
	Fayette	1.52 (.58-3.55)
	Floyd	1.35 (.53-3.09)
	Forsyth	1.3 (.58-2.57)
	Franklin	3.85 (1.38-9.71)
	Fulton	1.82 (1.25-2.54)
	Gilmer	4.39 (1.72-10.27)
	Glascock	3.99 (1.28-12.44)
	Glynn	1.31 (.5-3.11)
	Gordon	2.88 (1.23-6.1)
	Grady	5.1 (2.03-11.18)
	Greene	10.66 (4.2-24.05)
	Gwinnett	1.18 (.75-1.77)
	Habersham	2.27 (.86-5.43)
	Hall	3.53 (2.07-5.66)
	Hancock	3.66 (1.2-10.61)
	Haralson	1.25 (.42-3.52)
	Harris	3 (1.06-7.53)
	Hart	4.56 (1.71-10.9)
	Heard	1.41 (.44-4.24)
	Henry	2.92 (1.6-4.87)
	Houston	2.38 (1.16-4.37)
	Irwin	3.53 (1.19-10.07)
	Jackson	3.3 (1.45-6.84)
	Jasper	2.57 (.87-7.28)
	Jeff Davis	3.98 (1.4-10.11)
	Jefferson	3.96 (1.4-10.15)
	Jenkins	4.75 (1.59-12.95)
	Johnson	2.58 (.83-7.66)
	Jones	3.06 (1.14-7.41)
	Lamar	1.85 (.62-5.25)
	Lanier	3.76 (1.33-10.04)
	Laurens	2.6 (1.01-5.89)
	Lee	2.38 (.84-6.1)
	Liberty	2.06 (.89-4.28)
	Lincoln	2.21 (.7-6.73)
	Long	3.36 (1.23-8.69)
	Lowndes	2.4 (1.14-4.61)
	Lumpkin	5.27 (2.08-11.95)
	McDuffie	3.93 (1.5-9.5)
	McIntosh	2.93 (.97-8.05)
	Macon	5.6 (2-14.11)
	Madison	3.16 (1.16-7.87)
	Marion	2.14 (.68-6.39)
	Meriwether	1.79 (.6-4.88)
	Miller	6.78 (2.3-18.23)
	Mitchell	3.46 (1.28-8.54)
	Monroe	3.3 (1.19-8.42)
	Montgomery	2.59 (.83-7.59)
	Morgan	3.36 (1.16-9)
	Murray	3.89 (1.62-8.35)
	Muscogee	1.97 (.99-3.53)
	Newton	1.83 (.77-3.79)
	Oconee	2.36 (.86-6)
	Oglethorpe	2.13 (.68-6.12)
	Paulding	1.25 (.54-2.6)
	Peach	3.07 (1.14-7.55)
	Pickens	1.27 (.42-3.51)
	Pierce	6.04 (2.36-14.06)
	Pike	1.35 (.44-4.04)
	Polk	3.84 (1.65-8.18)
	Pulaski	2.2 (.71-6.48)
	Putnam	3.75 (1.37-9.3)
	Quitman	4.12 (1.29-12.77)
	Rabun	4.42 (1.58-11.63)
	Randolph	3.59 (1.2-10.47)
	Richmond	3.78 (2.27-5.97)
	Rockdale	2.11 (.9-4.54)
	Schley	2.73 (.87-8.48)
	Screven	6.75 (2.55-16.3)
	Seminole	3.65 (1.19-10.46)
	Spalding	1.95 (.78-4.44)
	Stephens	2.77 (.99-7.15)
	Stewart	3.93 (1.21-11.92)
	Sumter	1.9 (.67-4.94)
	Talbot	3.76 (1.21-11.02)
	Taliaferro	4.12 (1.27-13.06)
	Tattnall	5.73 (2.24-12.9)
	Taylor	4.87 (1.64-13.28)
	Telfair	3.18 (1.06-8.63)
	Terrell	4.06 (1.36-11.3)
	Thomas	2.5 (.96-5.82)
	Tift	4.76 (2.07-9.8)
	Toombs	2.51 (.9-6.29)
	Towns	5.14 (1.69-14.28)
	Treutlen	4.91 (1.65-13.46)
	Troup	4.72 (2.26-8.81)
	Turner	4.73 (1.56-13.14)
	Twiggs	2.27 (.72-6.81)
	Union	3.24 (1.1-8.74)
	Upson	2.1 (.73-5.57)
	Walker	2.58 (1.03-5.59)
	Walton	2.11 (.89-4.47)
	Ware	3 (1.14-7.01)
	Warren	5.09 (1.71-14.29)
	Washington	4.72 (1.8-11.31)
	Wayne	4.79 (1.91-10.54)
	Webster	4.07 (1.28-12.68)
	Wheeler	3.73 (1.23-10.79)
	White	3.62 (1.33-8.98)
	Whitfield	1.46 (.6-3.11)
	Wilcox	11.05 (3.95-27.8)
	Wilkes	3.47 (1.13-9.87)
	Wilkinson	7.81 (2.82-19.44)
	Worth	2.57 (.9-6.93)
	Hawaii
	Hawaii	2.24 (1.12-4.04)
	Honolulu	.65 (.36-1.09)
	Kalawao	2.58 (.79-8.53)
	Kauai	2.36 (.96-5.19)
	Maui	1.4 (.6-2.92)
	Idaho
	Ada	.98 (.48-1.74)
	Adams	5.62 (1.77-16.9)
	Bannock	2.89 (1.33-5.57)
	Bear Lake	5.06 (1.65-14.4)
	Benewah	6.25 (2.2-16.7)
	Bingham	4.94 (2.35-9.36)
	Blaine	2.85 (1.01-7.51)
	Boise	5.98 (1.98-17.4)
	Bonner	3.95 (1.53-9.12)
	Bonneville	1.31 (.55-2.77)
	Boundary	3.43 (1.14-9.58)
	Butte	3.44 (1.07-10.67)
	Camas	2.93 (.89-9.55)
	Canyon	2.7 (1.56-4.39)
	Caribou	6.34 (2.2-17.03)
	Cassia	6.74 (2.99-13.79)
	Clark	4.21 (1.35-13.41)
	Clearwater	3.76 (1.21-11.03)
	Custer	3.98 (1.25-12)
	Elmore	5.22 (2.24-10.95)
	Franklin	2.04 (.67-5.73)
	Fremont	3.93 (1.43-9.98)
	Gem	2.62 (.89-7.05)
	Gooding	3.84 (1.41-9.65)
	Idaho	4.3 (1.51-11.37)
	Jefferson	1.64 (.58-4.14)
	Jerome	5.7 (2.46-12.03)
	Kootenai	2.31 (1.1-4.41)
	Latah	1.99 (.7-5.16)
	Lemhi	3.71 (1.23-10.85)
	Lewis	3.94 (1.21-11.77)
	Lincoln	2.63 (.85-7.84)
	Madison	1.64 (.6-3.95)
	Minidoka	2.73 (.97-6.95)
	Nez Perce	2.88 (1.06-7)
	Oneida	5.26 (1.73-15.39)
	Owyhee	2.04 (.66-5.91)
	Payette	2.71 (.97-6.79)
	Power	4.54 (1.56-12.15)
	Shoshone	6.13 (2.13-15.98)
	Teton	2.37 (.79-6.7)
	Twin Falls	2.62 (1.21-5.19)
	Valley	8.46 (2.96-22.11)
	Washington	6.3 (2.19-16.57)
	Illinois
	Adams	1.41 (.52-3.43)
	Alexander	3.09 (1.02-8.79)
	Bond	2.57 (.85-7.23)
	Boone	2.25 (.86-5.22)
	Brown	5.31 (1.77-15.32)
	Bureau	2.01 (.7-5.25)
	Calhoun	1.5 (.46-4.85)
	Carroll	3.43 (1.13-9.44)
	Cass	3.24 (1.09-8.83)
	Champaign	1.01 (.42-2.13)
	Christian	3.23 (1.21-7.77)
	Clark	8.6 (3.37-20.02)
	Clay	3.3 (1.12-9.17)
	Clinton	1.59 (.55-4.21)
	Coles	4.16 (1.75-9.05)
	Cook	.85 (.67-1.06)
	Crawford	3.17 (1.07-8.64)
	Cumberland	2.51 (.82-7.24)
	DeKalb	1.11 (.42-2.58)
	De Witt	2.1 (.71-5.95)
	Douglas	2.94 (1.01-7.67)
	DuPage	.33 (.15-.64)
	Edgar	3.11 (1.09-8.2)
	Edwards	3.77 (1.21-10.97)
	Effingham	6.65 (2.88-13.42)
	Fayette	4.89 (1.83-11.73)
	Ford	2.93 (1-8.36)
	Franklin	6.45 (2.86-12.98)
	Fulton	2.63 (.96-6.61)
	Gallatin	3.84 (1.23-11.55)
	Greene	3.31 (1.12-9.14)
	Grundy	.95 (.32-2.57)
	Hamilton	3.64 (1.19-10.54)
	Hancock	3.98 (1.47-10.42)
	Hardin	3.97 (1.26-12.05)
	Henderson	2.7 (.86-8.24)
	Henry	3.04 (1.24-6.88)
	Iroquois	6.65 (2.78-14.42)
	Jackson	3.66 (1.5-7.94)
	Jasper	4.76 (1.61-12.86)
	Jefferson	3.72 (1.48-8.54)
	Jersey	2.39 (.82-6.59)
	Jo Daviess	3.96 (1.39-10.11)
	Johnson	3.51 (1.14-10.41)
	Kane	1.06 (.59-1.75)
	Kankakee	1.03 (.39-2.4)
	Kendall	1.12 (.45-2.45)
	Knox	1.63 (.58-4.18)
	Lake	.79 (.43-1.34)
	LaSalle	1.58 (.65-3.48)
	Lawrence	5.58 (1.99-14.3)
	Lee	4.05 (1.59-9.21)
	Livingston	2.26 (.79-5.64)
	Logan	3.52 (1.31-8.81)
	McDonough	2.83 (1.01-7.34)
	McHenry	.72 (.31-1.51)
	McLean	1.26 (.54-2.63)
	Macon	2.71 (1.24-5.22)
	Macoupin	2.42 (.91-5.88)
	Madison	.87 (.38-1.8)
	Marion	4.36 (1.8-9.31)
	Marshall	2.1 (.68-6.2)
	Mason	3.37 (1.14-9.35)
	Massac	6.75 (2.54-16.32)
	Menard	2.19 (.71-6.27)
	Mercer	2 (.67-5.76)
	Monroe	1.65 (.57-4.43)
	Montgomery	3.51 (1.3-8.56)
	Morgan	1.36 (.45-3.67)
	Moultrie	6.73 (2.52-16.01)
	Ogle	1.75 (.63-4.31)
	Peoria	1.11 (.48-2.3)
	Perry	5.05 (1.89-12.21)
	Piatt	2.86 (.95-7.86)
	Pike	3.15 (1.08-8.46)
	Pope	5.56 (1.76-16.8)
	Pulaski	5.2 (1.69-15.2)
	Putnam	2.72 (.86-8.47)
	Randolph	4.38 (1.69-10.12)
	Richland	3.19 (1.09-8.69)
	Rock Island	1.1 (.44-2.42)
	St. Clair	2.36 (1.33-3.88)
	Saline	3.72 (1.33-9.16)
	Sangamon	2.2 (1.12-3.98)
	Schuyler	3.71 (1.21-10.66)
	Scott	2.74 (.88-8.17)
	Shelby	3 (1.04-7.71)
	Stark	3.15 (1-9.39)
	Stephenson	2.31 (.87-5.58)
	Tazewell	1.25 (.51-2.72)
	Union	10.03 (4.07-22.01)
	Vermilion	1.92 (.79-4.23)
	Wabash	3.4 (1.12-9.46)
	Warren	3.15 (1.09-8.4)
	Washington	4.4 (1.52-11.5)
	Wayne	4.12 (1.42-10.41)
	White	3.24 (1.11-8.84)
	Whiteside	1.68 (.61-4.1)
	Will	1.38 (.85-2.09)
	Williamson	2.24 (.88-5.12)
	Winnebago	.74 (.32-1.54)
	Woodford	2.64 (.98-6.3)
	Indiana
	Adams	3.29 (1.35-7.18)
	Allen	1 (.5-1.81)
	Bartholomew	3.23 (1.45-6.48)
	Benton	2.25 (.72-6.73)
	Blackford	5.86 (2.06-15.14)
	Boone	1.05 (.36-2.79)
	Brown	1.41 (.46-4.28)
	Carroll	2.66 (.93-7.12)
	Cass	2.35 (.88-5.71)
	Clark	2.19 (.98-4.4)
	Clay	6.23 (2.46-13.79)
	Clinton	3.71 (1.46-8.23)
	Crawford	3.48 (1.15-9.61)
	Daviess	2.92 (1.1-6.76)
	Dearborn	1.86 (.68-4.54)
	Decatur	4.4 (1.68-10.4)
	DeKalb	2.84 (1.1-6.52)
	Delaware	2.11 (.9-4.38)
	Dubois	2.32 (.86-5.66)
	Elkhart	3.5 (2.09-5.54)
	Fayette	2.83 (1-7.46)
	Floyd	1 (.36-2.53)
	Fountain	4.11 (1.46-10.6)
	Franklin	3.72 (1.35-9.24)
	Fulton	4.76 (1.76-11.56)
	Gibson	4.78 (1.92-10.46)
	Grant	2.41 (.97-5.35)
	Greene	4.16 (1.61-9.4)
	Hamilton	.85 (.39-1.66)
	Hancock	1.3 (.48-3.17)
	Harrison	2.58 (.96-6.3)
	Hendricks	.75 (.28-1.74)
	Henry	3.57 (1.43-7.96)
	Howard	2.39 (1.01-5.08)
	Huntington	3.14 (1.2-7.38)
	Jackson	4.23 (1.76-9.26)
	Jasper	4.99 (2-10.98)
	Jay	2.85 (1-7.36)
	Jefferson	2.05 (.73-5.36)
	Jennings	4.2 (1.62-9.86)
	Johnson	1.15 (.48-2.48)
	Knox	4.66 (1.88-10.07)
	Kosciusko	2.52 (1.08-5.24)
	LaGrange	7.05 (3.52-12.9)
	Lake	1.46 (.85-2.37)
	LaPorte	2.42 (1.06-4.83)
	Lawrence	2.92 (1.11-6.68)
	Madison	1.24 (.5-2.79)
	Marion	1.4 (.94-2.03)
	Marshall	2.16 (.84-5.11)
	Martin	4.62 (1.56-12.39)
	Miami	3.21 (1.22-7.53)
	Monroe	1.49 (.59-3.34)
	Montgomery	3.01 (1.15-7.06)
	Morgan	1.65 (.63-3.85)
	Newton	1.95 (.63-5.74)
	Noble	2.59 (1.02-5.87)
	Ohio	1.5 (.45-4.84)
	Orange	3.92 (1.4-9.97)
	Owen	4.46 (1.61-11.04)
	Parke	3.16 (1.08-8.64)
	Perry	3.99 (1.44-10.25)
	Pike	7.37 (2.69-18.09)
	Porter	1.35 (.57-2.85)
	Posey	2.43 (.84-6.48)
	Pulaski	3.36 (1.14-9.22)
	Putnam	1.65 (.55-4.36)
	Randolph	2.86 (1.04-7.18)
	Ripley	6.2 (2.56-13.24)
	Rush	3.16 (1.08-8.5)
	St. Joseph	.92 (.41-1.85)
	Scott	3.02 (1.06-7.79)
	Shelby	1.96 (.71-4.83)
	Spencer	3.89 (1.43-9.83)
	Starke	2.85 (1-7.31)
	Steuben	3.36 (1.24-8.03)
	Sullivan	2.04 (.69-5.7)
	Switzerland	7.44 (2.71-18.39)
	Tippecanoe	1.32 (.57-2.69)
	Tipton	7.33 (2.69-17.81)
	Union	2.06 (.64-6.32)
	Vanderburgh	1.33 (.58-2.7)
	Vermillion	2.89 (.97-7.98)
	Vigo	1.36 (.54-3.16)
	Wabash	2.65 (.96-6.49)
	Warren	4.96 (1.64-13.82)
	Warrick	1.43 (.51-3.54)
	Washington	2.92 (1.02-7.39)
	Wayne	3.31 (1.46-6.76)
	Wells	1.78 (.61-4.76)
	White	5.76 (2.25-13.05)
	Whitley	2.23 (.81-5.67)
	Iowa
	Adair	3.66 (1.16-10.65)
	Adams	3.96 (1.26-12.01)
	Allamakee	3.24 (1.09-8.64)
	Appanoose	3.33 (1.12-9.17)
	Audubon	5.25 (1.71-15.22)
	Benton	4.82 (1.84-11.42)
	Black Hawk	1.29 (.53-2.78)
	Boone	3.59 (1.36-9.08)
	Bremer	2.58 (.89-6.74)
	Buchanan	2.83 (1-7.14)
	Buena Vista	3.68 (1.36-9.11)
	Butler	3.19 (1.08-8.52)
	Calhoun	3.61 (1.19-10.32)
	Carroll	4.63 (1.77-11.04)
	Cass	5.5 (1.99-14.03)
	Cedar	3.07 (1.07-8.01)
	Cerro Gordo	2.14 (.77-5.24)
	Cherokee	3.46 (1.16-9.56)
	Chickasaw	3.31 (1.13-9.24)
	Clarke	3.45 (1.18-9.61)
	Clay	2.3 (.76-6.38)
	Clayton	5.13 (1.9-12.79)
	Clinton	2.22 (.83-5.22)
	Crawford	3.01 (1.05-7.92)
	Dallas	1.82 (.75-3.98)
	Davis	2.51 (.79-7.24)
	Decatur	4.86 (1.66-13.33)
	Delaware	7.86 (3.08-17.57)
	Des Moines	1.87 (.66-4.67)
	Dickinson	2.45 (.82-6.95)
	Dubuque	3.41 (1.63-6.62)
	Emmet	3.45 (1.16-9.65)
	Fayette	3 (1.03-7.9)
	Floyd	4.11 (1.43-10.59)
	Franklin	4.59 (1.6-12.49)
	Fremont	3.67 (1.21-10.66)
	Greene	4.9 (1.69-13.5)
	Grundy	2.18 (.72-6.24)
	Guthrie	2.15 (.68-6.43)
	Hamilton	4.2 (1.44-10.94)
	Hancock	3.45 (1.13-9.62)
	Hardin	3.09 (1.07-8.32)
	Harrison	4.72 (1.66-12.16)
	Henry	4.01 (1.43-10.18)
	Howard	3.43 (1.15-9.68)
	Humboldt	4.69 (1.65-12.61)
	Ida	3.66 (1.21-10.57)
	Iowa	8.4 (3.28-19.32)
	Jackson	4 (1.43-10.33)
	Jasper	6.74 (2.94-13.72)
	Jefferson	4.43 (1.52-11.92)
	Johnson	1.42 (.58-3.04)
	Jones	6.78 (2.66-15.59)
	Keokuk	3.5 (1.14-10.11)
	Kossuth	3.24 (1.09-9)
	Lee	2.01 (.69-5.18)
	Linn	.96 (.41-1.99)
	Louisa	3.46 (1.15-9.76)
	Lucas	3.59 (1.19-10.22)
	Lyon	3.24 (1.1-8.78)
	Madison	2.62 (.89-7.23)
	Mahaska	4.58 (1.71-11.05)
	Marion	2.53 (.91-6.18)
	Marshall	3.49 (1.39-7.8)
	Mills	1.98 (.64-5.72)
	Mitchell	4.69 (1.6-12.4)
	Monona	3.63 (1.19-10.29)
	Monroe	3.57 (1.15-10.42)
	Montgomery	6.25 (2.19-16.29)
	Muscatine	1.78 (.63-4.35)
	O'Brien	3.24 (1.08-8.84)
	Osceola	6.89 (2.35-19.12)
	Page	4.26 (1.51-11.13)
	Palo Alto	4.76 (1.61-13)
	Plymouth	3.21 (1.14-8.06)
	Pocahontas	3.71 (1.21-10.89)
	Polk	1.32 (.75-2.18)
	Pottawattamie	2.44 (1.09-4.91)
	Poweshiek	4.16 (1.47-10.7)
	Ringgold	9.49 (3.11-25.39)
	Sac	4.74 (1.59-13.03)
	Scott	1.29 (.57-2.62)
	Shelby	3.44 (1.15-9.77)
	Sioux	2.39 (.89-5.64)
	Story	1.7 (.65-3.9)
	Tama	4.06 (1.43-10.4)
	Taylor	3.81 (1.22-11.05)
	Union	3.32 (1.09-9.31)
	Van Buren	3.64 (1.21-10.48)
	Wapello	1.93 (.69-4.95)
	Warren	2.5 (.95-5.76)
	Washington	1.97 (.66-5.33)
	Wayne	3.73 (1.19-10.81)
	Webster	3.15 (1.19-7.49)
	Winnebago	6.27 (2.17-16.36)
	Winneshiek	3.13 (1.05-8.41)
	Woodbury	1.22 (.5-2.7)
	Worth	4.98 (1.66-14.25)
	Wright	4.3 (1.49-11.31)
	Kansas
	Allen	3.27 (1.1-8.89)
	Anderson	6.38 (2.19-16.67)
	Atchison	2.35 (.79-6.52)
	Barber	3.86 (1.24-11.51)
	Barton	2 (.7-5.24)
	Bourbon	3.1 (1.08-8.33)
	Brown	4.53 (1.54-12.08)
	Butler	2.54 (1.05-5.54)
	Chase	4.06 (1.29-12.94)
	Chautauqua	4.03 (1.28-12.41)
	Cherokee	3.74 (1.36-9.39)
	Cheyenne	4.1 (1.3-12.61)
	Clark	4.08 (1.29-12.63)
	Clay	3.52 (1.17-9.97)
	Cloud	3.47 (1.14-9.86)
	Coffey	6.52 (2.2-17.86)
	Comanche	4.16 (1.3-12.9)
	Cowley	2.41 (.9-5.78)
	Crawford	1.92 (.69-4.81)
	Decatur	4.1 (1.29-12.58)
	Dickinson	4.87 (1.8-11.83)
	Doniphan	5.87 (1.95-16.33)
	Douglas	1.51 (.6-3.36)
	Edwards	4.03 (1.27-12.62)
	Elk	4.06 (1.27-12.49)
	Ellis	2.05 (.74-5.3)
	Ellsworth	5.24 (1.75-14.96)
	Finney	1.67 (.61-4.09)
	Ford	5.24 (2.35-10.41)
	Franklin	3.38 (1.27-8.28)
	Geary	2.45 (.99-5.5)
	Gove	4.06 (1.26-12.54)
	Graham	4.12 (1.29-12.99)
	Grant	4.56 (1.57-12.2)
	Gray	6.5 (2.24-17.28)
	Greeley	4.16 (1.31-13.08)
	Greenwood	3.75 (1.2-10.97)
	Hamilton	3.89 (1.23-11.99)
	Harper	3.71 (1.22-11.02)
	Harvey	3.35 (1.32-7.82)
	Haskell	5.25 (1.71-15.01)
	Hodgeman	4.14 (1.28-12.87)
	Jackson	2.85 (.99-7.92)
	Jefferson	9.03 (3.56-20.38)
	Jewell	4.11 (1.31-12.81)
	Johnson	.99 (.54-1.65)
	Kearny	2.76 (.87-8.54)
	Kingman	2.21 (.72-6.7)
	Kiowa	8.01 (2.58-24.56)
	Labette	2.85 (.99-7.35)
	Lane	4.16 (1.28-13.04)
	Leavenworth	.97 (.35-2.4)
	Lincoln	3.97 (1.23-12.44)
	Linn	1.44 (.46-4.31)
	Logan	4.1 (1.27-12.81)
	Lyon	3.09 (1.18-7.19)
	McPherson	4.23 (1.65-9.66)
	Marion	6.07 (2.12-16.03)
	Marshall	4.63 (1.59-12.65)
	Meade	7.11 (2.34-20.1)
	Miami	2.68 (1-6.56)
	Mitchell	6.94 (2.35-18.95)
	Montgomery	3.03 (1.16-7.08)
	Morris	3.87 (1.23-11.4)
	Morton	4.04 (1.26-12.41)
	Nemaha	6.1 (2.09-15.84)
	Neosho	3.07 (1.04-8.09)
	Ness	4.04 (1.28-12.41)
	Norton	3.89 (1.22-11.88)
	Osage	6.08 (2.3-14.75)
	Osborne	3.96 (1.22-12.03)
	Ottawa	2.73 (.88-8.22)
	Pawnee	3.75 (1.2-10.67)
	Phillips	3.79 (1.23-11.24)
	Pottawatomie	1.86 (.64-4.99)
	Pratt	6.13 (2.14-16.12)
	Rawlins	4.11 (1.27-12.72)
	Reno	2.37 (.94-5.29)
	Republic	3.92 (1.23-11.98)
	Rice	4.69 (1.58-12.64)
	Riley	2 (.8-4.44)
	Rooks	3.82 (1.22-11.58)
	Rush	4.07 (1.27-12.65)
	Russell	3.77 (1.24-11.02)
	Saline	1.99 (.77-4.59)
	Scott	3.74 (1.19-11.09)
	Sedgwick	1.83 (1.17-2.75)
	Seward	3.1 (1.18-7.23)
	Shawnee	1.97 (.96-3.64)
	Sheridan	5.7 (1.78-17.34)
	Sherman	5.08 (1.69-14.67)
	Smith	4.03 (1.24-12.43)
	Stafford	3.95 (1.3-12.14)
	Stanton	5.69 (1.79-17.34)
	Stevens	3.67 (1.22-10.51)
	Sumner	5.93 (2.38-13.42)
	Thomas	3.56 (1.16-10.35)
	Trego	7.94 (2.55-24.45)
	Wabaunsee	2.31 (.76-6.9)
	Wallace	5.95 (1.84-18.43)
	Washington	7.1 (2.35-20.09)
	Wichita	5.71 (1.84-17.11)
	Wilson	4.7 (1.59-12.81)
	Woodson	4.04 (1.26-12.28)
	Wyandotte	1.56 (.74-2.98)
	Kentucky
	Adair	3.95 (1.47-10.07)
	Allen	2.6 (.89-6.94)
	Anderson	2.88 (1.02-7.52)
	Ballard	3.66 (1.19-10.68)
	Barren	2.87 (1.11-6.64)
	Bath	2.44 (.79-7.03)
	Bell	2.77 (.97-7.06)
	Boone	1.41 (.6-2.94)
	Bourbon	1.93 (.64-5.39)
	Boyd	1.98 (.71-4.89)
	Boyle	4.59 (1.74-10.81)
	Bracken	1.44 (.45-4.38)
	Breathitt	7.16 (2.68-17.17)
	Breckinridge	5 (1.88-12.14)
	Bullitt	1.27 (.47-3.13)
	Butler	10.24 (4.04-23.37)
	Caldwell	4.45 (1.53-11.88)
	Calloway	2.6 (.95-6.6)
	Campbell	1.44 (.56-3.33)
	Carlisle	5.27 (1.74-15.56)
	Carroll	7.27 (2.73-17.86)
	Carter	3.46 (1.29-8.48)
	Casey	3.2 (1.09-8.58)
	Christian	2.54 (1.18-4.94)
	Clark	3.47 (1.32-8.16)
	Clay	4.85 (1.84-11.92)
	Clinton	6.09 (2.11-15.93)
	Crittenden	6.17 (2.15-16.65)
	Cumberland	6.68 (2.26-18.39)
	Daviess	3.16 (1.49-6.02)
	Edmonson	2.21 (.74-6.5)
	Elliott	3.67 (1.2-10.72)
	Estill	3.27 (1.11-9.01)
	Fayette	.62 (.26-1.35)
	Fleming	4.25 (1.48-11.19)
	Floyd	5.37 (2.27-11.21)
	Franklin	4.77 (2.05-9.85)
	Fulton	2.66 (.87-7.87)
	Gallatin	2.01 (.65-5.88)
	Garrard	4.12 (1.45-10.71)
	Grant	1.24 (.41-3.44)
	Graves	3.03 (1.15-7.14)
	Grayson	3.57 (1.28-8.81)
	Green	4.56 (1.53-12.45)
	Greenup	2.21 (.78-5.69)
	Hancock	3.12 (1.02-9.27)
	Hardin	3.84 (2-6.69)
	Harlan	3.35 (1.23-8.12)
	Harrison	3.06 (1.06-8.1)
	Hart	9.38 (3.91-20.49)
	Henderson	1.94 (.71-4.69)
	Henry	2.6 (.86-7.08)
	Hickman	3.84 (1.22-11.68)
	Hopkins	1.75 (.63-4.43)
	Jackson	3.32 (1.14-9.47)
	Jefferson	1.84 (1.22-2.67)
	Jessamine	3.95 (1.74-8.2)
	Johnson	3.82 (1.4-9.43)
	Kenton	1.43 (.64-2.86)
	Knott	5.44 (1.96-13.85)
	Knox	6.72 (2.96-13.63)
	Larue	3.8 (1.3-10.02)
	Laurel	3.54 (1.53-7.47)
	Lawrence	5.25 (1.87-12.94)
	Lee	5.16 (1.69-14.87)
	Leslie	3.48 (1.16-9.74)
	Letcher	3.65 (1.33-8.94)
	Lewis	5.56 (2.01-13.99)
	Lincoln	4.48 (1.7-10.57)
	Livingston	2.59 (.84-7.77)
	Logan	4.38 (1.65-10.17)
	Lyon	3.8 (1.22-11.31)
	McCracken	2.96 (1.25-6.39)
	McCreary	3.12 (1.08-8.38)
	McLean	2.25 (.72-6.66)
	Madison	2.58 (1.1-5.45)
	Magoffin	4.42 (1.55-11.34)
	Marion	3.8 (1.4-9.54)
	Marshall	4.45 (1.7-10.43)
	Martin	4.52 (1.54-12.02)
	Mason	3.03 (1.03-7.9)
	Meade	3.58 (1.38-8.25)
	Menifee	2.7 (.85-8.24)
	Mercer	3.87 (1.4-9.84)
	Metcalfe	2.55 (.84-7.43)
	Monroe	3.47 (1.14-9.88)
	Montgomery	2.08 (.73-5.46)
	Morgan	4.56 (1.56-12.21)
	Muhlenberg	2.73 (.96-6.83)
	Nelson	2.8 (1.06-6.36)
	Nicholas	3.68 (1.19-10.72)
	Ohio	4.41 (1.67-10.4)
	Oldham	1.4 (.5-3.54)
	Owen	4.5 (1.55-12.17)
	Owsley	5.38 (1.76-15.71)
	Pendleton	1.39 (.45-4.11)
	Perry	7.71 (3.27-16.22)
	Pike	2.28 (.9-5.18)
	Powell	3.27 (1.12-8.93)
	Pulaski	2.48 (.98-5.58)
	Robertson	4.11 (1.28-13.13)
	Rockcastle	5.35 (1.97-13.43)
	Rowan	2.91 (1.01-7.59)
	Russell	6.6 (2.53-15.48)
	Scott	2.3 (.89-5.34)
	Shelby	1.5 (.52-3.9)
	Simpson	7.87 (3.14-17.73)
	Spencer	1.36 (.44-3.97)
	Taylor	2.16 (.72-5.85)
	Todd	3.19 (1.09-8.7)
	Trigg	2.79 (.89-7.8)
	Trimble	2.8 (.93-8.25)
	Union	4.24 (1.46-11.06)
	Warren	2.63 (1.22-5.08)
	Washington	3.42 (1.14-9.75)
	Wayne	7.45 (2.95-16.58)
	Webster	3.22 (1.09-8.63)
	Whitley	3.21 (1.21-7.52)
	Wolfe	4.98 (1.64-13.97)
	Woodford	5.13 (1.97-11.91)
	Louisiana
	Acadia Parish	3.4 (1.5-6.82)
	Allen Parish	4.39 (1.66-10.34)
	Ascension Parish	4.78 (2.64-8)
	Assumption Parish	9.74 (4.29-19.88)
	Avoyelles Parish	4.17 (1.75-9)
	Beauregard Parish	1.91 (.67-4.79)
	Bienville Parish	5.66 (2.02-14.45)
	Bossier Parish	3.58 (1.87-6.23)
	Caddo Parish	1.34 (.65-2.46)
	Calcasieu Parish	1.34 (.61-2.62)
	Caldwell Parish	7.9 (2.86-19.95)
	Cameron Parish	3.23 (1.03-9.48)
	Catahoula Parish	4.63 (1.55-12.72)
	Claiborne Parish	3.22 (1.11-8.73)
	Concordia Parish	3.69 (1.33-9.19)
	De Soto Parish	1.77 (.62-4.84)
	East Baton Rouge Parish	2.25 (1.4-3.41)
	East Carroll Parish	3.53 (1.18-10.02)
	East Feliciana Parish	8.69 (3.42-19.34)
	Evangeline Parish	2.99 (1.16-6.94)
	Franklin Parish	3.59 (1.27-8.93)
	Grant Parish	4.28 (1.61-10.45)
	Iberia Parish	4.01 (1.94-7.49)
	Iberville Parish	3.59 (1.39-8.44)
	Jackson Parish	4.06 (1.46-10.35)
	Jefferson Parish	1.42 (.79-2.38)
	Jefferson Davis Parish	3.18 (1.18-7.32)
	Lafayette Parish	1.82 (.93-3.26)
	Lafourche Parish	3.09 (1.44-5.87)
	LaSalle Parish	5.39 (1.98-13.36)
	Lincoln Parish	1.81 (.65-4.5)
	Livingston Parish	3 (1.55-5.32)
	Madison Parish	4.4 (1.54-11.57)
	Morehouse Parish	4.15 (1.62-9.56)
	Natchitoches Parish	5.11 (2.15-10.71)
	Orleans Parish	1.72 (.94-2.9)
	Ouachita Parish	4.97 (2.99-7.83)
	Plaquemines Parish	1.73 (.58-4.78)
	Pointe Coupee Parish	4.1 (1.48-10.14)
	Rapides Parish	2.4 (1.17-4.54)
	Red River Parish	7.76 (2.79-19.09)
	Richland Parish	2.88 (1.02-7.39)
	Sabine Parish	5.44 (2.11-12.35)
	St. Bernard Parish	1.14 (.39-3.05)
	St. Charles Parish	1.75 (.65-4.18)
	St. Helena Parish	3.73 (1.27-10.13)
	St. James Parish	1.73 (.58-4.7)
	St. John the Baptist Parish	1.81 (.66-4.34)
	St. Landry Parish	4.75 (2.49-8.35)
	St. Martin Parish	3.8 (1.64-7.79)
	St. Mary Parish	5.43 (2.53-10.33)
	St. Tammany Parish	1.21 (.55-2.35)
	Tangipahoa Parish	3.8 (2-6.62)
	Tensas Parish	3.77 (1.25-11.34)
	Terrebonne Parish	3.44 (1.74-6.19)
	Union Parish	5.22 (2.03-12.18)
	Vermilion Parish	3.06 (1.29-6.46)
	Vernon Parish	2.19 (.9-4.75)
	Washington Parish	5.33 (2.42-10.66)
	Webster Parish	2.06 (.75-5.08)
	West Baton Rouge Parish	3.86 (1.43-9.34)
	West Carroll Parish	11.46 (4.56-25.96)
	West Feliciana Parish	2.13 (.69-6.2)
	Winn Parish	3.18 (1.08-8.67)
	Maine
	Androscoggin	1.31 (.52-2.93)
	Aroostook	3.14 (1.3-6.88)
	Cumberland	1.18 (.55-2.3)
	Franklin	3.69 (1.3-9.1)
	Hancock	3.63 (1.44-8.12)
	Kennebec	1.61 (.64-3.6)
	Knox	4.16 (1.61-9.81)
	Lincoln	2.8 (.99-7.06)
	Oxford	2.82 (1.09-6.41)
	Penobscot	1.23 (.49-2.74)
	Piscataquis	3.35 (1.11-9.44)
	Sagadahoc	2.29 (.8-5.95)
	Somerset	3.57 (1.42-7.96)
	Waldo	2.58 (.92-6.47)
	Washington	3.53 (1.3-8.63)
	York	1.82 (.83-3.55)
	Maryland
	Allegany	2.41 (.93-5.57)
	Anne Arundel	1.04 (.56-1.77)
	Baltimore	1.01 (.58-1.62)
	Calvert	.98 (.35-2.47)
	Caroline	5.53 (2.32-11.57)
	Carroll	1.4 (.59-2.97)
	Cecil	2.01 (.86-4.22)
	Charles	2.42 (1.18-4.51)
	Dorchester	1.99 (.69-5.1)
	Frederick	.77 (.32-1.67)
	Garrett	4.56 (1.73-10.81)
	Harford	1.22 (.57-2.38)
	Howard	.84 (.36-1.69)
	Kent	3.17 (1.08-8.4)
	Montgomery	.31 (.14-.6)
	Prince George's	1.84 (1.26-2.61)
	Queen Anne's	2.44 (.94-5.81)
	St. Mary's	1.12 (.44-2.57)
	Somerset	1.9 (.63-5.26)
	Talbot	3.34 (1.27-8.13)
	Washington	1.96 (.9-3.87)
	Wicomico	2.11 (.89-4.44)
	Worcester	2.15 (.77-5.42)
	Baltimore city	1.6 (1-2.44)
	Massachusetts
	Barnstable	1.27 (.53-2.78)
	Berkshire	1.52 (.6-3.4)
	Bristol	.59 (.27-1.16)
	Dukes	2.43 (.79-6.85)
	Essex	.67 (.34-1.18)
	Franklin	1.71 (.63-4.19)
	Hampden	1.41 (.77-2.35)
	Hampshire	1.77 (.71-3.87)
	Middlesex	.39 (.2-.67)
	Nantucket	3.43 (1.17-9.66)
	Norfolk	.86 (.45-1.48)
	Plymouth	.71 (.33-1.37)
	Suffolk	.76 (.4-1.34)
	Worcester	.66 (.35-1.17)
	Michigan
	Alcona	3.8 (1.21-11.27)
	Alger	3.77 (1.2-11.24)
	Allegan	2.39 (1.09-4.75)
	Alpena	2.15 (.73-5.75)
	Antrim	3.04 (1.07-8.09)
	Arenac	3.36 (1.13-9.49)
	Baraga	3.7 (1.17-10.97)
	Barry	1.78 (.65-4.28)
	Bay	2.18 (.93-4.55)
	Benzie	4.16 (1.46-11.05)
	Berrien	2.49 (1.19-4.68)
	Branch	1.81 (.65-4.43)
	Calhoun	1.77 (.79-3.59)
	Cass	5.91 (2.7-11.53)
	Charlevoix	2.91 (1.02-7.68)
	Cheboygan	3.9 (1.41-10.01)
	Chippewa	2.6 (.91-6.59)
	Clare	2.71 (.98-6.93)
	Clinton	2.52 (1.03-5.42)
	Crawford	3.48 (1.14-9.63)
	Delta	2.62 (.94-6.53)
	Dickinson	2.23 (.76-6.09)
	Eaton	2.12 (.9-4.49)
	Emmet	2.77 (.97-6.92)
	Genesee	1.78 (1.03-2.88)
	Gladwin	3.01 (1.03-7.75)
	Gogebic	3.35 (1.15-9.19)
	Grand Traverse	1.33 (.49-3.2)
	Gratiot	3.09 (1.17-7.25)
	Hillsdale	4.21 (1.77-8.88)
	Houghton	1.98 (.69-5.15)
	Huron	4.46 (1.73-10.57)
	Ingham	1.28 (.6-2.44)
	Ionia	1.97 (.76-4.61)
	Iosco	4.13 (1.45-10.74)
	Iron	4.89 (1.64-13.39)
	Isabella	3.09 (1.28-6.63)
	Jackson	1.58 (.69-3.2)
	Kalamazoo	2.01 (1.05-3.52)
	Kalkaska	2.35 (.8-6.61)
	Kent	.85 (.47-1.45)
	Keweenaw	2.93 (.89-9.26)
	Lake	3.6 (1.19-10.21)
	Lapeer	.68 (.23-1.85)
	Leelanau	3.19 (1.08-8.68)
	Lenawee	3.69 (1.76-7.05)
	Livingston	.76 (.28-1.8)
	Luce	5.35 (1.7-15.44)
	Mackinac	3.66 (1.21-10.79)
	Macomb	.83 (.46-1.4)
	Manistee	3.11 (1.04-8.37)
	Marquette	1.17 (.41-3.04)
	Mason	4.44 (1.7-10.49)
	Mecosta	3.15 (1.21-7.44)
	Menominee	5.08 (1.89-12.32)
	Midland	1.56 (.59-3.62)
	Missaukee	2.4 (.79-6.85)
	Monroe	2.06 (.92-4)
	Montcalm	4.91 (2.26-9.71)
	Montmorency	3.77 (1.21-11.22)
	Muskegon	1.85 (.87-3.55)
	Newaygo	3.43 (1.39-7.56)
	Oakland	.68 (.39-1.11)
	Oceana	3.46 (1.28-8.24)
	Ogemaw	5.3 (1.93-13.09)
	Ontonagon	3.96 (1.24-12.16)
	Osceola	4.7 (1.74-11.14)
	Oscoda	3.67 (1.19-10.78)
	Otsego	2.91 (1.02-7.6)
	Ottawa	1.39 (.69-2.58)
	Presque Isle	4.82 (1.62-13.33)
	Roscommon	4.2 (1.45-11.08)
	Saginaw	2.02 (.98-3.75)
	St. Clair	.79 (.29-1.82)
	St. Joseph	2.83 (1.18-6.01)
	Sanilac	3.7 (1.44-8.34)
	Schoolcraft	3.73 (1.22-10.92)
	Shiawassee	2.01 (.77-4.67)
	Tuscola	2.74 (1.09-6.32)
	Van Buren	1.98 (.81-4.43)
	Washtenaw	1.4 (.7-2.54)
	Wayne	1.79 (1.36-2.31)
	Wexford	1.95 (.69-4.99)
	Minnesota
	Aitkin	7.41 (2.75-18.08)
	Anoka	.57 (.24-1.21)
	Becker	2.51 (.92-6.27)
	Beltrami	2.14 (.81-5.02)
	Benton	2.07 (.77-5.08)
	Big Stone	3.87 (1.23-11.76)
	Blue Earth	1.46 (.55-3.57)
	Brown	2.79 (.96-7.23)
	Carlton	2.17 (.79-5.44)
	Carver	1.65 (.67-3.54)
	Cass	4.37 (1.67-10.02)
	Chippewa	3.31 (1.12-9.05)
	Chisago	3.32 (1.39-7.15)
	Clay	1.45 (.52-3.58)
	Clearwater	3.49 (1.14-9.98)
	Cook	5.56 (1.8-16.77)
	Cottonwood	3.45 (1.14-9.55)
	Crow Wing	1.61 (.59-3.85)
	Dakota	1.02 (.52-1.81)
	Dodge	2.58 (.88-6.73)
	Douglas	2.54 (.92-6.39)
	Faribault	3.32 (1.11-9.11)
	Fillmore	2.59 (.92-6.73)
	Freeborn	2.64 (.95-6.5)
	Goodhue	1.8 (.65-4.47)
	Grant	3.77 (1.21-10.78)
	Hennepin	.72 (.43-1.14)
	Houston	2.72 (.93-7.49)
	Hubbard	3.01 (1.03-7.93)
	Isanti	1.51 (.53-3.92)
	Itasca	2.45 (.9-6.03)
	Jackson	4.67 (1.56-12.89)
	Kanabec	4.19 (1.47-11)
	Kandiyohi	2.78 (1.07-6.41)
	Kittson	3.99 (1.28-11.87)
	Koochiching	3.48 (1.15-9.92)
	Lac qui Parle	3.79 (1.18-10.98)
	Lake	3.56 (1.17-10.3)
	Lake of the Woods	3.96 (1.26-12.14)
	Le Sueur	1.66 (.57-4.52)
	Lincoln	3.77 (1.23-10.87)
	Lyon	2.03 (.72-5.32)
	McLeod	2.42 (.89-5.87)
	Mahnomen	3.69 (1.18-10.87)
	Marshall	3.58 (1.19-10.05)
	Martin	3.9 (1.39-9.9)
	Meeker	2.8 (.98-7.15)
	Mille Lacs	3.57 (1.35-8.69)
	Morrison	7.59 (3.44-15.24)
	Mower	1.81 (.65-4.51)
	Murray	3.59 (1.17-10.44)
	Nicollet	2.91 (1.08-6.98)
	Nobles	2.72 (.95-7)
	Norman	3.7 (1.25-10.72)
	Olmsted	1.03 (.42-2.21)
	Otter Tail	3.86 (1.68-8.16)
	Pennington	5.46 (1.97-13.58)
	Pine	3.5 (1.3-8.67)
	Pipestone	3.49 (1.15-9.68)
	Polk	1.78 (.63-4.67)
	Pope	4.65 (1.61-12.56)
	Ramsey	.34 (.14-.72)
	Red Lake	3.89 (1.23-11.69)
	Redwood	4.1 (1.45-10.5)
	Renville	3.25 (1.09-8.9)
	Rice	1.98 (.77-4.57)
	Rock	4.61 (1.53-12.63)
	Roseau	3.18 (1.11-8.37)
	St. Louis	1.37 (.59-2.82)
	Scott	1.29 (.55-2.66)
	Sherburne	1.35 (.53-3.06)
	Sibley	3.32 (1.14-8.99)
	Stearns	1.78 (.82-3.52)
	Steele	2.91 (1.12-6.79)
	Stevens	3.49 (1.15-9.95)
	Swift	3.59 (1.19-9.97)
	Todd	2.76 (.99-6.97)
	Traverse	4.04 (1.27-12.75)
	Wabasha	1.98 (.67-5.55)
	Wadena	3.23 (1.07-8.63)
	Waseca	4.95 (1.86-12.11)
	Washington	.75 (.3-1.62)
	Watonwan	3.35 (1.12-9.42)
	Wilkin	2.72 (.86-8.12)
	Winona	2.9 (1.13-6.69)
	Wright	1.08 (.44-2.33)
	Yellow Medicine	3.48 (1.16-9.68)
	Mississippi
	Adams	2 (.68-5.16)
	Alcorn	1.89 (.66-4.79)
	Amite	3.22 (1.11-8.76)
	Attala	7.03 (2.81-15.4)
	Benton	2.01 (.65-5.97)
	Bolivar	4.36 (1.78-9.51)
	Calhoun	5.24 (1.9-13.07)
	Carroll	2.54 (.82-7.51)
	Chickasaw	2.98 (1.04-7.76)
	Choctaw	3.59 (1.19-10.27)
	Claiborne	3.49 (1.14-10.09)
	Clarke	5.13 (1.89-12.8)
	Clay	2.89 (.98-7.52)
	Coahoma	4.78 (1.94-10.61)
	Copiah	7.27 (3.16-14.62)
	Covington	4.69 (1.74-11.17)
	DeSoto	1.42 (.64-2.87)
	Forrest	2.15 (.89-4.61)
	Franklin	3.58 (1.18-9.99)
	George	4.4 (1.67-10.29)
	Greene	5.66 (1.99-14.55)
	Grenada	2.19 (.76-5.86)
	Hancock	2.06 (.74-5.09)
	Harrison	3.81 (2.25-6.03)
	Hinds	1.65 (.85-2.91)
	Holmes	5.39 (2.12-12.17)
	Humphreys	3.28 (1.1-8.9)
	Issaquena	4.24 (1.31-13.45)
	Itawamba	8.35 (3.57-17.87)
	Jackson	2.44 (1.17-4.54)
	Jasper	3.08 (1.07-8.16)
	Jefferson	4.99 (1.66-13.84)
	Jefferson Davis	3.32 (1.1-9.17)
	Jones	7.39 (4.05-12.57)
	Kemper	4.55 (1.54-12.38)
	Lafayette	2.95 (1.12-7.03)
	Lamar	4.82 (2.26-9.22)
	Lauderdale	3.25 (1.5-6.21)
	Lawrence	4.22 (1.47-11.01)
	Leake	6.32 (2.6-13.72)
	Lee	2.53 (1.11-5.08)
	Leflore	2.38 (.88-5.69)
	Lincoln	3.6 (1.43-8.12)
	Lowndes	3.35 (1.45-6.89)
	Madison	3.02 (1.45-5.73)
	Marion	4.07 (1.59-9.39)
	Marshall	5.47 (2.4-11.07)
	Monroe	2.42 (.9-5.91)
	Montgomery	4.47 (1.52-12.08)
	Neshoba	8.16 (3.87-15.42)
	Newton	6.86 (2.85-14.91)
	Noxubee	4.37 (1.52-11.49)
	Oktibbeha	2.87 (1.1-6.51)
	Panola	2.4 (.89-5.85)
	Pearl River	2.99 (1.27-6.45)
	Perry	2.89 (.95-7.99)
	Pike	6.27 (2.94-12.26)
	Pontotoc	7.75 (3.47-15.37)
	Prentiss	5.47 (2.14-12.42)
	Quitman	4.78 (1.61-13.21)
	Rankin	2.65 (1.33-4.83)
	Scott	6.48 (2.85-13.27)
	Sharkey	3.77 (1.23-11.17)
	Simpson	2.25 (.8-5.8)
	Smith	7.87 (3.13-17.64)
	Stone	3.95 (1.41-10)
	Sunflower	3.95 (1.53-9.14)
	Tallahatchie	4.1 (1.44-10.41)
	Tate	4.29 (1.66-9.82)
	Tippah	4.53 (1.72-10.58)
	Tishomingo	5.09 (1.85-12.26)
	Tunica	1.37 (.44-4.09)
	Union	3.36 (1.25-8.05)
	Walthall	5.22 (1.93-12.7)
	Warren	2.66 (1.03-6.03)
	Washington	2.03 (.77-4.71)
	Wayne	3.65 (1.36-8.87)
	Webster	4.59 (1.55-12.36)
	Wilkinson	3.46 (1.16-9.62)
	Winston	4.74 (1.78-11.32)
	Yalobusha	5.62 (2.06-14.29)
	Yazoo	1.72 (.59-4.56)
	Missouri
	Adair	2.87 (.98-7.69)
	Andrew	2.8 (.94-7.74)
	Atchison	3.9 (1.24-11.66)
	Audrain	3.44 (1.24-8.39)
	Barry	4.7 (1.9-10.24)
	Barton	3.3 (1.13-9.17)
	Bates	1.87 (.61-5.21)
	Benton	3.29 (1.11-9.06)
	Bollinger	2.15 (.71-6.2)
	Boone	1.28 (.55-2.67)
	Buchanan	1.39 (.53-3.18)
	Butler	4.25 (1.78-9.17)
	Caldwell	1.44 (.45-4.43)
	Callaway	3.3 (1.29-7.54)
	Camden	6.76 (2.92-13.81)
	Cape Girardeau	2.49 (1.04-5.34)
	Carroll	3.6 (1.17-10.39)
	Carter	3.67 (1.19-10.66)
	Cass	2.27 (1.02-4.61)
	Cedar	3.32 (1.13-9.09)
	Chariton	4.93 (1.66-13.72)
	Christian	2.19 (.92-4.63)
	Clark	3.6 (1.16-10.47)
	Clay	1.25 (.58-2.37)
	Clinton	1.32 (.44-3.85)
	Cole	2.42 (1.01-5.11)
	Cooper	4.1 (1.44-10.46)
	Crawford	3.52 (1.3-8.63)
	Dade	5.08 (1.66-14.5)
	Dallas	1.95 (.66-5.56)
	Daviess	3.51 (1.18-10.02)
	DeKalb	3.08 (.99-8.99)
	Dent	4.21 (1.5-11.08)
	Douglas	4.41 (1.51-11.82)
	Dunklin	6.65 (2.92-13.75)
	Franklin	2.3 (1.01-4.71)
	Gasconade	4.36 (1.53-11.46)
	Gentry	4.96 (1.66-14.02)
	Greene	.81 (.35-1.65)
	Grundy	3.39 (1.11-9.35)
	Harrison	3.44 (1.14-9.65)
	Henry	4.81 (1.83-11.38)
	Hickory	5.01 (1.65-13.92)
	Holt	3.9 (1.25-11.54)
	Howard	3.56 (1.15-9.91)
	Howell	1.8 (.65-4.58)
	Iron	3.49 (1.14-9.94)
	Jackson	2.31 (1.6-3.25)
	Jasper	.77 (.3-1.78)
	Jefferson	1.06 (.48-2.12)
	Johnson	4.93 (2.27-9.71)
	Knox	5.42 (1.74-15.9)
	Laclede	2.99 (1.15-7.11)
	Lafayette	2.11 (.74-5.43)
	Lawrence	4.28 (1.78-9.23)
	Lewis	2.54 (.84-7.27)
	Lincoln	3.57 (1.56-7.2)
	Linn	4.33 (1.53-11.11)
	Livingston	5.39 (1.95-13.6)
	McDonald	3.84 (1.41-9.15)
	Macon	3.15 (1.08-8.52)
	Madison	4.46 (1.54-11.9)
	Maries	4.78 (1.6-13.19)
	Marion	2.6 (.94-6.42)
	Mercer	3.93 (1.25-11.66)
	Miller	7.93 (3.43-16.72)
	Mississippi	4.31 (1.51-11.31)
	Moniteau	2.06 (.68-5.79)
	Monroe	3.61 (1.2-10.18)
	Montgomery	4.51 (1.54-12.27)
	Morgan	3.88 (1.42-9.7)
	New Madrid	3.87 (1.39-9.64)
	Newton	4.53 (2.02-8.88)
	Nodaway	2.26 (.76-6.28)
	Oregon	3.52 (1.16-9.83)
	Osage	2.14 (.69-6.14)
	Ozark	8.52 (3.07-21.88)
	Pemiscot	10.11 (4.49-20.99)
	Perry	3.91 (1.4-9.77)
	Pettis	2.2 (.83-5.2)
	Phelps	3.51 (1.41-7.68)
	Pike	4.01 (1.42-10.26)
	Platte	.93 (.34-2.29)
	Polk	2.87 (1.07-7.07)
	Pulaski	2.92 (1.22-6.32)
	Putnam	5.36 (1.77-15.35)
	Ralls	2.56 (.81-7.45)
	Randolph	2.8 (1-7.16)
	Ray	1.75 (.59-4.75)
	Reynolds	6.96 (2.35-19.74)
	Ripley	5.69 (2.05-14.31)
	St. Charles	.84 (.4-1.61)
	St. Clair	3.67 (1.19-10.52)
	Ste. Genevieve	8.28 (3.22-19.04)
	St. Francois	4.02 (1.79-8.03)
	St. Louis	1.18 (.74-1.79)
	Saline	2.18 (.74-5.87)
	Schuyler	3.87 (1.25-11.52)
	Scotland	3.74 (1.2-10.72)
	Scott	2.32 (.86-5.65)
	Shannon	3.58 (1.19-10.11)
	Shelby	5.01 (1.65-14.08)
	Stoddard	6.25 (2.58-13.59)
	Stone	3.72 (1.36-9.34)
	Sullivan	5.07 (1.7-14.38)
	Taney	2.74 (1.05-6.21)
	Texas	4.48 (1.72-10.63)
	Vernon	4.65 (1.74-11.02)
	Warren	1.19 (.39-3.27)
	Washington	5.47 (2.17-12.22)
	Wayne	3.4 (1.17-9.53)
	Webster	2.05 (.77-5.06)
	Worth	4.18 (1.32-13.12)
	Wright	3.84 (1.41-9.69)
	St. Louis city	2.8 (1.69-4.38)
	Montana
	Beaverhead	4.93 (1.63-14.1)
	Big Horn	7.23 (2.98-16.1)
	Blaine	3.57 (1.16-10.06)
	Broadwater	5.26 (1.69-15.39)
	Carbon	3.24 (1.03-9.62)
	Carter	4.31 (1.31-13.68)
	Cascade	1.76 (.72-3.92)
	Chouteau	5.07 (1.65-14.29)
	Custer	4.5 (1.53-12.11)
	Daniels	4.15 (1.29-13.06)
	Dawson	6.36 (2.17-16.85)
	Deer Lodge	3.75 (1.21-10.81)
	Fallon	3.97 (1.24-12.09)
	Fergus	3.48 (1.15-9.86)
	Flathead	1.69 (.68-3.79)
	Gallatin	2.78 (1.23-5.64)
	Garfield	5.96 (1.86-18.6)
	Glacier	6.17 (2.38-14.41)
	Golden Valley	2.57 (.79-8.4)
	Granite	4.12 (1.24-12.83)
	Hill	3 (1.04-7.98)
	Jefferson	8.09 (2.88-20.67)
	Judith Basin	8.28 (2.61-25.17)
	Lake	4.81 (1.94-10.48)
	Lewis and Clark	2.02 (.76-4.7)
	Liberty	5.8 (1.86-18.18)
	Lincoln	6.94 (2.59-16.59)
	McCone	4.16 (1.3-13.33)
	Madison	7.11 (2.39-19.53)
	Meagher	4.22 (1.32-13.46)
	Mineral	5.6 (1.78-17.2)
	Missoula	3.08 (1.44-6.05)
	Musselshell	3.99 (1.28-12.14)
	Park	4.39 (1.52-11.69)
	Petroleum	4.31 (1.3-13.75)
	Phillips	5.47 (1.77-16.71)
	Pondera	3.66 (1.17-10.62)
	Powder River	4.23 (1.3-13.41)
	Powell	9.79 (3.33-26.89)
	Prairie	4.25 (1.28-13.23)
	Ravalli	3.19 (1.22-7.56)
	Richland	3.53 (1.12-10.13)
	Roosevelt	3.15 (1.09-8.36)
	Rosebud	3.38 (1.11-9.44)
	Sanders	4.75 (1.55-13.31)
	Sheridan	4.07 (1.29-12.59)
	Silver Bow	2.02 (.71-5.2)
	Stillwater	3.62 (1.24-10.21)
	Sweet Grass	3.99 (1.27-12.47)
	Teton	3.81 (1.24-11.23)
	Toole	3.87 (1.24-11.65)
	Treasure	4.26 (1.31-13.62)
	Valley	6.73 (2.24-18.29)
	Wheatland	4.06 (1.26-12.82)
	Wibaux	4.2 (1.33-13.53)
	Yellowstone	.91 (.36-2.02)
	Nebraska
	Adams	3.99 (1.56-9.04)
	Antelope	5.06 (1.66-14.59)
	Arthur	6.09 (1.88-19.37)
	Banner	4.21 (1.29-14.03)
	Blaine	4.35 (1.34-14)
	Boone	3.79 (1.21-11.45)
	Box Butte	3.32 (1.1-9.3)
	Boyd	4.18 (1.29-12.89)
	Brown	4.08 (1.31-12.45)
	Buffalo	2.94 (1.17-6.51)
	Burt	5.16 (1.67-14.61)
	Butler	4.93 (1.67-13.56)
	Cass	3.98 (1.46-9.75)
	Cedar	4.76 (1.57-13.17)
	Chase	3.87 (1.23-11.47)
	Cherry	3.86 (1.25-11.47)
	Cheyenne	6.02 (2.13-15.9)
	Clay	3.71 (1.18-10.88)
	Colfax	3.17 (1.07-8.61)
	Cuming	3.54 (1.15-10.15)
	Custer	5.96 (2.1-15.83)
	Dakota	3.76 (1.4-8.9)
	Dawes	4.91 (1.68-13.68)
	Dawson	4.14 (1.62-9.48)
	Deuel	4.16 (1.32-13.12)
	Dixon	3.25 (1.04-9.74)
	Dodge	2.41 (.9-5.79)
	Douglas	.89 (.48-1.53)
	Dundy	4.2 (1.31-13.49)
	Fillmore	3.81 (1.22-11.36)
	Franklin	3.98 (1.26-12.36)
	Frontier	4.07 (1.25-12.78)
	Furnas	3.93 (1.25-11.97)
	Gage	2.89 (1.01-7.6)
	Garden	4.12 (1.28-13.16)
	Garfield	4.17 (1.26-13.21)
	Gosper	2.88 (.91-9.11)
	Grant	4.27 (1.31-13.87)
	Greeley	4.05 (1.29-12.56)
	Hall	1.69 (.65-3.93)
	Hamilton	2.29 (.73-6.71)
	Harlan	4.04 (1.27-12.16)
	Hayes	4.19 (1.3-13.52)
	Hitchcock	4.1 (1.28-12.48)
	Holt	3.5 (1.12-9.87)
	Hooker	4.27 (1.32-14.11)
	Howard	3.28 (1.06-9.65)
	Jefferson	4.98 (1.64-14.16)
	Johnson	3.89 (1.25-11.52)
	Kearney	2.66 (.84-7.95)
	Keith	8.76 (3.09-22.48)
	Keya Paha	4.27 (1.33-13.84)
	Kimball	3.95 (1.26-12.1)
	Knox	4.81 (1.65-12.97)
	Lancaster	.97 (.45-1.89)
	Lincoln	5.16 (2.27-10.61)
	Logan	4.24 (1.3-13.15)
	Loup	4.31 (1.33-13.88)
	McPherson	2.98 (.92-9.44)
	Madison	1.84 (.67-4.66)
	Merrick	2.29 (.71-6.88)
	Morrill	3.87 (1.21-11.62)
	Nance	3.93 (1.27-12.09)
	Nemaha	3.66 (1.21-10.89)
	Nuckolls	3.94 (1.28-11.84)
	Otoe	3.16 (1.09-8.4)
	Pawnee	4.07 (1.26-12.55)
	Perkins	4.03 (1.24-12.87)
	Phelps	3.52 (1.19-10.03)
	Pierce	2.69 (.85-8.1)
	Platte	2.44 (.9-5.96)
	Polk	3.86 (1.24-11.39)
	Red Willow	4.63 (1.6-12.31)
	Richardson	3.69 (1.2-10.56)
	Rock	4.23 (1.27-13.41)
	Saline	4.15 (1.45-10.75)
	Sarpy	1.16 (.52-2.35)
	Saunders	2.49 (.88-6.56)
	Scotts Bluff	1.64 (.57-4.18)
	Seward	4.58 (1.65-11.46)
	Sheridan	5.27 (1.75-15.18)
	Sherman	4.05 (1.29-12.33)
	Sioux	2.93 (.88-9.56)
	Stanton	2.65 (.84-7.92)
	Thayer	3.85 (1.22-11.48)
	Thomas	4.32 (1.33-14.16)
	Thurston	4.55 (1.52-12.18)
	Valley	3.91 (1.29-11.69)
	Washington	2.57 (.9-6.84)
	Wayne	3.62 (1.18-10.46)
	Webster	5.53 (1.77-16.34)
	Wheeler	4.21 (1.29-13.73)
	York	5.61 (1.97-14.11)
	Nevada
	Churchill	2.74 (.99-7.02)
	Clark	1.09 (.79-1.47)
	Douglas	4.66 (1.92-10.21)
	Elko	2.9 (1.2-6.16)
	Esmeralda	6.09 (1.91-19.36)
	Eureka	2.87 (.87-8.96)
	Humboldt	2.98 (1.04-7.81)
	Lander	6.62 (2.25-17.99)
	Lincoln	3.85 (1.2-11.77)
	Lyon	3.19 (1.27-6.91)
	Mineral	3.97 (1.21-12.31)
	Nye	7.69 (3.46-15.31)
	Pershing	3.82 (1.26-10.87)
	Storey	2.33 (.73-7.31)
	Washoe	1.53 (.86-2.54)
	White Pine	4.68 (1.6-12.61)
	Carson City	1.57 (.57-3.93)
	New Hampshire
	Belknap	2.23 (.83-5.24)
	Carroll	2.6 (.93-6.45)
	Cheshire	2.06 (.79-4.81)
	Coos	2.87 (1.01-7.5)
	Grafton	1.08 (.39-2.8)
	Hillsborough	.71 (.31-1.42)
	Merrimack	1.63 (.68-3.46)
	Rockingham	.71 (.28-1.53)
	Strafford	1.1 (.41-2.59)
	Sullivan	1.93 (.67-5)
	New Jersey
	Atlantic	2.89 (1.67-4.68)
	Bergen	.46 (.22-.85)
	Burlington	1.41 (.76-2.41)
	Camden	.67 (.32-1.26)
	Cape May	2.14 (.85-4.67)
	Cumberland	2.27 (1.13-4.12)
	Essex	.74 (.41-1.24)
	Gloucester	1.74 (.91-3.05)
	Hudson	1.02 (.57-1.68)
	Hunterdon	.91 (.33-2.26)
	Mercer	1.32 (.67-2.36)
	Middlesex	.56 (.29-1.01)
	Monmouth	.81 (.41-1.44)
	Morris	.6 (.27-1.19)
	Ocean	.79 (.42-1.38)
	Passaic	.67 (.32-1.25)
	Salem	1.36 (.49-3.38)
	Somerset	1.32 (.65-2.43)
	Sussex	.84 (.32-1.98)
	Union	.97 (.51-1.67)
	Warren	1.48 (.59-3.37)
	New Mexico
	Bernalillo	1.7 (1.09-2.53)
	Catron	4.12 (1.29-12.69)
	Chaves	3.39 (1.53-6.71)
	Cibola	4.21 (1.62-9.77)
	Colfax	5.9 (2.15-15.22)
	Curry	2.79 (1.18-5.96)
	De Baca	8.08 (2.6-25.12)
	Do√±a Ana	3.15 (1.81-5.09)
	Eddy	3 (1.24-6.59)
	Grant	2.67 (.96-6.85)
	Guadalupe	21.91 (7.97-54.1)
	Harding	4.3 (1.31-13.97)
	Hidalgo	7.15 (2.37-20.08)
	Lea	3.14 (1.44-6.17)
	Lincoln	5.35 (1.92-13.63)
	Los Alamos	2.38 (.78-6.64)
	Luna	5.18 (2.1-11.66)
	McKinley	3.07 (1.43-5.94)
	Mora	7.39 (2.46-21.81)
	Otero	2.21 (.9-4.88)
	Quay	8.41 (2.98-21.81)
	Rio Arriba	7.64 (3.61-14.55)
	Roosevelt	3.58 (1.32-8.87)
	Sandoval	2.53 (1.21-4.71)
	San Juan	3.62 (1.99-6.1)
	San Miguel	4.44 (1.65-10.39)
	Santa Fe	2.11 (.97-4.16)
	Sierra	3.55 (1.17-10.1)
	Socorro	11 (4.7-23.18)
	Taos	2.69 (1-6.77)
	Torrance	4.68 (1.63-12.21)
	Union	3.94 (1.26-11.9)
	Valencia	1.93 (.78-4.27)
	New York
	Albany	1.15 (.53-2.26)
	Allegany	2.95 (1.13-6.86)
	Bronx	.63 (.39-.96)
	Broome	1.49 (.66-3)
	Cattaraugus	1.79 (.69-4.06)
	Cayuga	2.37 (.95-5.18)
	Chautauqua	2.37 (1.09-4.65)
	Chemung	1.97 (.81-4.27)
	Chenango	3.56 (1.41-7.87)
	Clinton	2.41 (.98-5.37)
	Columbia	4.03 (1.68-8.7)
	Cortland	5.03 (2.14-10.49)
	Delaware	3.07 (1.18-7.16)
	Dutchess	.69 (.28-1.52)
	Erie	1.83 (1.22-2.65)
	Essex	5.2 (2.08-11.41)
	Franklin	2.32 (.89-5.51)
	Fulton	2.75 (1.09-6.26)
	Genesee	1.72 (.62-4.21)
	Greene	2.51 (.91-6.18)
	Hamilton	4.04 (1.24-12.68)
	Herkimer	2.29 (.87-5.29)
	Jefferson	2.71 (1.39-4.95)
	Kings	.62 (.42-.87)
	Lewis	5.3 (2.16-11.87)
	Livingston	3.42 (1.42-7.38)
	Madison	2.65 (1.09-5.76)
	Monroe	1.32 (.78-2.08)
	Montgomery	2.73 (1.08-6.3)
	Nassau	.87 (.53-1.33)
	New York	.58 (.33-.95)
	Niagara	.7 (.28-1.65)
	Oneida	1.54 (.74-2.95)
	Onondaga	.88 (.43-1.63)
	Ontario	2.1 (.89-4.55)
	Orange	1.39 (.75-2.37)
	Orleans	1.2 (.4-3.34)
	Oswego	2.3 (1.02-4.65)
	Otsego	1.63 (.57-4.21)
	Putnam	1.23 (.46-2.96)
	Queens	.62 (.4-.91)
	Rensselaer	2.58 (1.26-4.77)
	Richmond	.61 (.28-1.21)
	Rockland	1.02 (.5-1.87)
	St. Lawrence	2.58 (1.17-5.17)
	Saratoga	1.65 (.75-3.13)
	Schenectady	1.21 (.5-2.59)
	Schoharie	2.44 (.84-6.49)
	Schuyler	3.28 (1.12-8.91)
	Seneca	2.03 (.69-5.29)
	Steuben	2.02 (.83-4.37)
	Suffolk	1.09 (.73-1.57)
	Sullivan	4.86 (2.34-9.1)
	Tioga	2.06 (.76-5)
	Tompkins	1.79 (.7-4.16)
	Ulster	1.05 (.42-2.33)
	Warren	1.56 (.57-3.94)
	Washington	1.56 (.54-3.89)
	Wayne	1.49 (.57-3.42)
	Westchester	.46 (.23-.84)
	Wyoming	3.24 (1.22-7.64)
	Yates	1.73 (.58-4.65)
	North Carolina
	Alamance	2.79 (1.39-5.04)
	Alexander	1.69 (.58-4.51)
	Alleghany	3.55 (1.17-10.21)
	Anson	6.77 (2.79-14.66)
	Ashe	3.72 (1.36-9.15)
	Avery	3.35 (1.12-9.32)
	Beaufort	4.2 (1.75-9.05)
	Bertie	3.97 (1.42-10.06)
	Bladen	5.78 (2.46-12.22)
	Brunswick	3.37 (1.58-6.59)
	Buncombe	3.41 (1.96-5.49)
	Burke	2.36 (.98-5.08)
	Cabarrus	.82 (.34-1.78)
	Caldwell	2.9 (1.24-5.99)
	Camden	2.56 (.83-7.52)
	Carteret	2.68 (1.07-6.16)
	Caswell	5.04 (1.85-12.47)
	Catawba	1.64 (.72-3.33)
	Chatham	1.41 (.51-3.52)
	Cherokee	4.78 (1.76-11.61)
	Chowan	4.32 (1.51-11.19)
	Clay	3.62 (1.16-10.46)
	Cleveland	2.02 (.84-4.39)
	Columbus	7.27 (3.64-13.29)
	Craven	3.18 (1.57-5.86)
	Cumberland	1.87 (1.1-2.97)
	Currituck	1.79 (.6-5)
	Dare	2.68 (.97-6.64)
	Davidson	3.55 (1.92-6.06)
	Davie	2.15 (.78-5.37)
	Duplin	3.9 (1.75-7.77)
	Durham	1.1 (.53-2.09)
	Edgecombe	3.97 (1.73-8.14)
	Forsyth	1.71 (.96-2.86)
	Franklin	4.19 (1.87-8.35)
	Gaston	1.3 (.59-2.58)
	Gates	2.66 (.89-7.72)
	Graham	3.6 (1.19-10.42)
	Granville	2.66 (1.06-5.98)
	Greene	3.73 (1.36-9.4)
	Guilford	1.75 (1.02-2.79)
	Halifax	4.53 (1.99-9.28)
	Harnett	4.6 (2.58-7.63)
	Haywood	1.99 (.71-4.83)
	Henderson	1.2 (.46-2.86)
	Hertford	2.91 (.99-7.53)
	Hoke	2.91 (1.24-6.12)
	Hyde	7.3 (2.46-20.89)
	Iredell	2.05 (.97-3.95)
	Jackson	1.99 (.69-5.17)
	Johnston	2.4 (1.25-4.19)
	Jones	2.22 (.73-6.62)
	Lee	3.89 (1.72-7.82)
	Lenoir	1.64 (.6-3.93)
	Lincoln	1.97 (.78-4.48)
	McDowell	2.38 (.9-5.76)
	Macon	4.34 (1.63-10.09)
	Madison	2.73 (.92-7.59)
	Martin	2.9 (1.02-7.51)
	Mecklenburg	1.57 (1.07-2.22)
	Mitchell	4.49 (1.54-12.03)
	Montgomery	6.44 (2.66-14.07)
	Moore	2.61 (1.1-5.41)
	Nash	3.45 (1.62-6.58)
	New Hanover	1.17 (.5-2.43)
	Northampton	6.24 (2.34-14.77)
	Onslow	1.43 (.7-2.66)
	Orange	1.5 (.6-3.35)
	Pamlico	2.23 (.71-6.66)
	Pasquotank	2.33 (.88-5.71)
	Pender	2.98 (1.19-6.79)
	Perquimans	2.51 (.84-7.2)
	Person	2.13 (.76-5.4)
	Pitt	1.39 (.61-2.82)
[truncated: 1,195 more rows]

## Sheet: Suppl Table 3
	Supplementary Table 3. Urban-rural categories of counties in the highest decile of child moratality from road traffic accidents
	State	County	Median mortality, per 100,000 children
	Large central metro
	Large fringe metro
	Texas	Bastrop	5.81
	Medium metro
	Texas	Newton	9.71
	Louisiana	East Feliciana Parish	8.69
	Mississippi	Copiah	7.27
	Oklahoma	Le Flore	6.96
	Iowa	Jones	6.78
	Texas	Hudspeth	6.24
	South Carolina	Calhoun	6.02
	Idaho	Boise	5.98
	Florida	Martin	5.98
	Kansas	Sumner	5.93
	Michigan	Cass	5.91
	Small metro
	Kentucky	Butler	10.24
	Kansas	Jefferson	9.03
	Arizona	Coconino	8.94
	Texas	Jones	7.81
	Indiana	Clay	6.23
	Virginia	Buckingham	6.23
	Kansas	Osage	6.08
	Texas	Ector	5.98
	Kansas	Doniphan	5.87
	Texas	Robertson	5.77
	Micropolitan
	Arizona	Navajo	9.53
	Texas	Andrews	9.19
	North Carolina	Robeson	8.65
	Mississippi	Itawamba	8.35
	Montana	Jefferson	8.09
	Mississippi	Pontotoc	7.75
	Nevada	Nye	7.69
	Oklahoma	Ottawa	7.66
	New Mexico	Rio Arriba	7.64
	Oklahoma	Beckham	7.6
	Mississippi	Jones	7.39
	Indiana	Pike	7.37
	Georgia	Decatur	7.37
	Texas	Titus	7.21
	Georgia	Bulloch	7.09
	Illinois	Massac	6.75
	Idaho	Cassia	6.74
	Iowa	Jasper	6.74
	Kentucky	Knox	6.72
	Illinois	Effingham	6.65
	Missouri	Dunklin	6.65
	Arkansas	Yell	6.65
	Oklahoma	Bryan	6.57
	Oregon	Wasco	6.54
	Tennessee	Obion	6.32
	Alabama	Coosa	6.29
	Mississippi	Pike	6.27
	North Carolina	Northampton	6.24
	Texas	Scurry	6.11
	Oklahoma	Payne	6.11
	Georgia	Pierce	6.04
	Florida	Putnam	5.96
	Wisconsin	Marinette	5.8
	Florida	Columbia	5.77
	Utah	Uintah	5.74
	Texas	Trinity	5.7
	Idaho	Jerome	5.7
	Oklahoma	Woodward	5.66
	Tennessee	McMinn	5.56
	Noncore
	New Mexico	Guadalupe	21.91
	Texas	Pecos	19.29
	South Dakota	Oglala Lakota	19.18
	Texas	Live Oak	19.04
	Arizona	La Paz	18.69
	Texas	Ward	18.59
	Texas	Sutton	16.32
	Colorado	Cheyenne	15.15
	Texas	Gonzales	14.43
	Wyoming	Carbon	13.33
	Oregon	Jefferson	12.7
	Alabama	Escambia	11.78
	Louisiana	West Carroll Parish	11.46
	Texas	Refugio	11.28
	South Dakota	Moody	11.06
	Georgia	Wilcox	11.05
	New Mexico	Socorro	11
	Texas	Culberson	10.71
	Texas	McCulloch	10.67
	Georgia	Greene	10.66
	Texas	Ochiltree	10.39
	Missouri	Pemiscot	10.11
	Illinois	Union	10.03
	South Dakota	Jackson	9.98
	Utah	Emery	9.97
	North Dakota	Benson	9.93
	Oklahoma	Ellis	9.92
	Texas	Zavala	9.82
	Montana	Powell	9.79
	Louisiana	Assumption Parish	9.74
	Texas	Van Zandt	9.74
	Texas	Panola	9.64
	Texas	Crockett	9.62
	Iowa	Ringgold	9.49
	Arkansas	Marion	9.41
	Kentucky	Hart	9.38
	North Dakota	Bottineau	9.34
	Texas	Lavaca	9.11
	Arkansas	Chicot	9.03
	Texas	Dimmit	9.02
	Colorado	Las Animas	8.81
	Oklahoma	Jefferson	8.78
	Nebraska	Keith	8.76
	Alabama	Covington	8.72
	Illinois	Clark	8.6
	Alabama	Monroe	8.6
	Missouri	Ozark	8.52
	Idaho	Valley	8.46
	New Mexico	Quay	8.41
	Iowa	Iowa	8.4
	California	Alpine	8.36
	Montana	Judith Basin	8.28
	Missouri	Ste. Genevieve	8.28
	Alabama	Greene	8.27
	North Dakota	Divide	8.27
	Mississippi	Neshoba	8.16
	Oklahoma	McIntosh	8.15
	Alabama	Washington	8.12
	North Dakota	Nelson	8.08
	New Mexico	De Baca	8.08
	Kansas	Kiowa	8.01
	South Carolina	Lee	7.99
	Arkansas	Carroll	7.99
	Florida	Jackson	7.98
	South Carolina	Clarendon	7.98
	Kansas	Trego	7.94
	Missouri	Miller	7.93
	Texas	Eastland	7.92
	Oklahoma	Nowata	7.91
	Louisiana	Caldwell Parish	7.9
	Kentucky	Simpson	7.87
	Mississippi	Smith	7.87
	West Virginia	Jackson	7.86
	Iowa	Delaware	7.86
	Georgia	Wilkinson	7.81
	Louisiana	Red River Parish	7.76
	Texas	Runnels	7.72
	Kentucky	Perry	7.71
	Virginia	Lexington city	7.66
	Texas	Red River	7.62
	Minnesota	Morrison	7.59
	Arkansas	Polk	7.56
	Florida	Levy	7.55
	Texas	Cass	7.54
	Texas	Kimble	7.52
	North Carolina	Sampson	7.52
	Alabama	Choctaw	7.5
	Alabama	Bullock	7.46
	Kentucky	Wayne	7.45
	Indiana	Switzerland	7.44
	Wyoming	Hot Springs	7.44
	Colorado	Gunnison	7.44
	Tennessee	Grundy	7.42
	Minnesota	Aitkin	7.41
	New Mexico	Mora	7.39
	Oklahoma	Alfalfa	7.34
	Indiana	Tipton	7.33
	Colorado	Washington	7.33
	Texas	Colorado	7.32
	North Carolina	Hyde	7.3
	West Virginia	Braxton	7.29
	South Dakota	Lyman	7.29
	Kentucky	Carroll	7.27
	North Carolina	Columbus	7.27
	Montana	Big Horn	7.23
	Georgia	Evans	7.22
	Oregon	Baker	7.18
	Texas	Haskell	7.17
	West Virginia	Tucker	7.16
	Kentucky	Breathitt	7.16
	New Mexico	Hidalgo	7.15
	North Carolina	Washington	7.13
	Montana	Madison	7.11
	Kansas	Meade	7.11
	Kansas	Washington	7.1
	Indiana	LaGrange	7.05
	Mississippi	Attala	7.03
	Texas	Hartley	7.03
	Missouri	Reynolds	6.96
	Montana	Lincoln	6.94
	South Dakota	Bon Homme	6.94
	Kansas	Mitchell	6.94
	Iowa	Osceola	6.89
	Texas	Comanche	6.87
	Mississippi	Newton	6.86
	North Dakota	Pembina	6.79
	Georgia	Miller	6.78
	North Carolina	Anson	6.77
	Missouri	Camden	6.76
	Georgia	Screven	6.75
	Pennsylvania	Susquehanna	6.74
	Texas	Childress	6.74
	Montana	Valley	6.73
	Illinois	Moultrie	6.73
	Arkansas	Prairie	6.7
	Wyoming	Platte	6.69
	Kentucky	Cumberland	6.68
	Illinois	Iroquois	6.65
	Virginia	Rockbridge	6.62
	Nevada	Lander	6.62
	Kentucky	Russell	6.6
	Texas	Mitchell	6.52
	Kansas	Coffey	6.52
	Arkansas	Monroe	6.51
	Kansas	Gray	6.5
	Mississippi	Scott	6.48
	Illinois	Franklin	6.45
	North Carolina	Montgomery	6.44
	Georgia	Fannin	6.42
	Oklahoma	Delaware	6.42
	Texas	Sabine	6.41
	North Dakota	McKenzie	6.41
	Florida	Holmes	6.4
	Washington	Lincoln	6.39
	Kansas	Anderson	6.38
	Montana	Dawson	6.36
	Idaho	Caribou	6.34
	Mississippi	Leake	6.32
	Alabama	Macon	6.31
	Tennessee	Meigs	6.3
	Idaho	Washington	6.3
	California	Colusa	6.27
	Iowa	Winnebago	6.27
	Florida	Franklin	6.27
	Idaho	Benewah	6.25
	Missouri	Stoddard	6.25
	Utah	Grand	6.25
	Iowa	Montgomery	6.25
	Texas	Freestone	6.22
	Tennessee	Haywood	6.21
	Indiana	Ripley	6.2
	Montana	Glacier	6.17
	Kentucky	Crittenden	6.17
	Arizona	Greenlee	6.15
	Idaho	Shoshone	6.13
	Kansas	Pratt	6.13
	Texas	Winkler	6.12
	Texas	Borden	6.12
	Kansas	Nemaha	6.1
	Nevada	Esmeralda	6.09
	Nebraska	Arthur	6.09
	Kentucky	Clinton	6.09
	Kansas	Marion	6.07
	Colorado	Jackson	6.04
	Texas	Terrell	6.02
	Nebraska	Cheyenne	6.02
	Arizona	Apache	6.01
	Utah	San Juan	5.99
	Georgia	Early	5.98
	Montana	Garfield	5.96
	Oklahoma	Pushmataha	5.96
	Nebraska	Custer	5.96
	Kansas	Wallace	5.95
	South Carolina	Williamsburg	5.94
	Texas	Jeff Davis	5.93
	Alabama	Butler	5.93
	Texas	Fayette	5.92
	New Mexico	Colfax	5.9
	Texas	Throckmorton	5.89
	Indiana	Blackford	5.86
	Oklahoma	Okfuskee	5.85
	Washington	Garfield	5.84
	North Dakota	Steele	5.84
	Texas	Edwards	5.83
	Wyoming	Big Horn	5.82
	North Dakota	Towner	5.82
	North Dakota	Adams	5.82
	Colorado	Chaffee	5.81
	Wyoming	Lincoln	5.8
	North Dakota	Rolette	5.8
	Montana	Liberty	5.8
	Alabama	Conecuh	5.79
	North Dakota	Kidder	5.78
	North Carolina	Bladen	5.78
	Oklahoma	Hughes	5.77
	Indiana	White	5.76
	Georgia	Tattnall	5.73
	South Dakota	Douglas	5.72
	Kansas	Wichita	5.71
	Virginia	Brunswick	5.71
	Kansas	Sheridan	5.7
	Texas	Concho	5.7
	Missouri	Ripley	5.69
	Texas	Wood	5.69
	Kansas	Stanton	5.69
	Texas	Real	5.67
	Texas	Llano	5.67
	Louisiana	Bienville Parish	5.66
	Mississippi	Greene	5.66
	Oklahoma	Blaine	5.65
	North Dakota	Cavalier	5.64
	Wisconsin	Rusk	5.64
	Texas	Mason	5.63
	Pennsylvania	Forest	5.62
	West Virginia	Morgan	5.62
	Idaho	Adams	5.62
	Mississippi	Yalobusha	5.62
	Texas	Sherman	5.62
	Nebraska	York	5.61
	Colorado	Crowley	5.61
	Oklahoma	Craig	5.61
	Montana	Mineral	5.6
	Georgia	Macon	5.6
	Virginia	Wythe	5.59
	Illinois	Lawrence	5.58
	Kentucky	Lewis	5.56
	Texas	Parmer	5.56
	Minnesota	Cook	5.56
	Wisconsin	Washburn	5.56
	Illinois	Pope	5.56
	Florida	Dixie	5.55
	Texas	Kinney	5.54
	Georgia	Clay	5.54
	Texas	San Jacinto	5.53
	Nebraska	Webster	5.53
	Texas	Donley	5.53
	Maryland	Caroline	5.53
